1  
2  
3  
4  
5  
6  
7  
8  
9  
10  
11  
12  
13  
14  
15  
16  
17  
18  
19  
20  
21  
22  
23  
24  
25  
26  
27  
28  
29  
30  
31  
32  
33  
34  
35  
36

## Tfap2a is a novel gatekeeper of differentiation in renal progenitors during kidney development

Brooke E. Chambers<sup>1</sup>, Gary F. Gerlach<sup>1</sup>, Karen H. Chen<sup>1</sup>, Eleanor G. Clark<sup>1</sup>, Ignaty Leshchiner<sup>2</sup>,  
Wolfram Goessling<sup>2</sup>, and Rebecca A. Wingert<sup>1\*</sup>

<sup>1</sup>Department of Biological Sciences, Center for Stem Cells and Regenerative Medicine,  
Center for Zebrafish Research, University of Notre Dame, Notre Dame, 46556, USA

<sup>2</sup> Brigham and Women's Hospital, Genetics and Gastroenterology Division,  
Harvard Medical School, Harvard Stem Cell Institute, Boston, MA 02215, USA

\*Corresponding author

**Keywords:** kidney, nephron, segmentation, differentiation, *tfap2a*, *tfap2b*, *irx3b*, *irx1a*, zebrafish

**Key Abbreviations:** branchio-oculo-facial syndrome (BOFS); corpuscle of Stannius (CS); distal early (DE); distal late (DL); fluorescent whole mount *in situ* hybridization (FISH); immunofluorescence (IF); *iroquois homeobox 1a* (*irx1a*); *iroquois homeobox 3b* (*irx3b*); hours post fertilization (hpf); mesenchymal to epithelial transition (MET); morpholino oligonucleotide (MO); proximal convoluted tubule (PCT); proximal straight tubule (PST); somite stage (ss); thick ascending limb (TAL); *transcription factor AP-2 alpha* (*tfap2a*); *transcription factor AP-2 beta* (*tfap2b*); whole mount *in situ* hybridization (WISH); wild-type (WT)

**Correspondence:** Rebecca A. Wingert, Ph.D., Department of Biological Sciences, University of Notre Dame, 100 Galvin Life Sciences, Notre Dame, IN 46556, USA; Email: [rwingert@nd.edu](mailto:rwingert@nd.edu), Phone: (574)-631-0907, Fax: (574)-631-7413

## 37 **Summary Statement**

38 Here, we report for the first time that *transcription factor AP-2 alpha (tfap2a)* controls the progression from  
39 nephron progenitor into the fully differentiated state. This fundamentally deepens our knowledge about the  
40 genetic control of kidney development.

41

42

## 43 **Abstract**

44 Renal functional units known as nephrons undergo patterning events during development that create a  
45 segmental array of cellular populations with discrete physiological tasks. Knowledge about the terminal  
46 differentiation programs of each nephron segment has central importance for understanding kidney  
47 disease and to advance regenerative medicine, as mammalian nephrons grown in organoid cultures from  
48 pluripotent cells fail to terminally differentiate. Here, from a novel forward genetic screen using zebrafish  
49 we report the discovery that *transcription factor AP-2 alpha (tfap2a)* coordinates a gene regulatory network  
50 that controls the progression of nephron distal segment progenitors into the differentiated state.  
51 Overexpression of *tfap2a* rescued differentiation in mutants and caused ectopic expression of distal  
52 segment markers in wild-type nephrons, indicating *tfap2a* is sufficient to instigate the distal segment  
53 differentiation program. *tfap2a/2b* deficiency exacerbated distal nephron segment differentiation defects,  
54 revealing functional redundancy where *tfap2a* has a dominant role upstream of its family member. With  
55 further genetic studies, we assembled a blueprint of the *tfap2a* gene regulatory network during  
56 nephrogenesis. We demonstrate that *tfap2a* acts downstream of *Iroquois homeobox 3b*, a conserved distal  
57 lineage transcription factor. *tfap2a* controls a circuit consisting of *irx1a*, *tfap2b*, and genes encoding solute  
58 transporters that dictate the specialized metabolic functions of the distal nephron segments, and we show  
59 for the first time that this regulatory node is distinct from the pathway circuits controlling aspects such as  
60 apical-basal polarity and ciliogenesis during the differentiation process. Thus, our studies reveal new  
61 insights into the genetic control of differentiation, where *tfap2a* regulates the suite of segment transporter  
62 traits. These findings have relevance for understanding renal birth defects, as well as efforts to recapitulate  
63 nephrogenesis *in vivo* to make functional units that can facilitate organoid applications such as drug  
64 discovery and regenerative therapies.

## 65 Introduction

66 Vertebrate kidney ontogeny involves the reiterative formation and degradation of several structures from  
67 the intermediate mesoderm: the pronephros, the mesonephros, and the metanephros (Saxen, 1987). In  
68 amniotes, the metanephros serves as the final kidney form, while in lower vertebrates, such as fish and  
69 frogs, the mesonephros functions as the adult kidney. Importantly, all the kidney versions are comprised of  
70 conserved functional units called nephrons (Dressler, 2006). The nephron is comprised of a blood filter, a  
71 segmented epithelial tubule, and a collecting duct. Each of these anatomical nephron parts modifies the  
72 filtrate in a stepwise fashion to perform the vital tasks of excretion, pH balance, and fluid homeostasis.  
73 Occurring in approximately 1 in 500 births, Congenital Anomalies of the Kidney and Urinary Tract (CAKUT)  
74 are among the most common birth defects and are the primary cause of pediatric end stage renal disease  
75 (ESRD) (Airik and Kispert, 2007; Song and Yosypiv, 2011). The shared etiology across these diverse  
76 conditions is the aberrant development of nephrons stemming from genetic dysregulation (Schedl, 2007).  
77 To this end, it is imperative to understand the signals that coordinate nephron formation during renal  
78 organogenesis.

79  
80 The zebrafish pronephros has emerged as a genetically tractable vertebrate model to study the molecular  
81 mechanisms regulating nephron segment development events (Wingert et al., 2007; Wingert and  
82 Davidson, 2008; Wingert and Davidson, 2011). The embryonic zebrafish is transparent in nature, and its  
83 pronephric kidney is structurally simple, consisting of two bilateral nephrons that make it an excellent  
84 model to study renal progenitor changes *in vivo* (Naylor et al., 2017). Like other vertebrate nephrons, the  
85 zebrafish pronephros is patterned into distinct proximal and distal epithelial segments (Wingert et al., 2007;  
86 Wingert and Davidson, 2008). Further, zebrafish mirror fundamental processes of mammalian nephron  
87 formation such as the mesenchymal to epithelial transition (MET) of renal progenitors, establishment of  
88 apical-basal polarity, lumen formation, ciliogenesis, and formation of specialized segment populations  
89 (Gerlach and Wingert, 2013). While there has been significant progress in understanding nephron segment  
90 patterning in recent years (Desgrange and Cereghini, 2015; Lindström et al., 2015; Chung et al., 2017), the  
91 pathways that dictate segmental terminal differentiation are far from understood.

92  
93 Transcription factors play a central role in operating the genetic networks that orchestrate renal cell fate  
94 acquisition and nephron segment patterning (Desgrange and Cereghini, 2015; Lindström et al., 2015).  
95 Advances in single-cell RNA sequencing and gene expression analysis in both the embryonic murine and  
96 human kidneys have brought to light an inventory of factors mapped to distinct regions of developing  
97 nephrons (Lindström et al., 2018a,b). Although these studies have provided a detailed transcription factor  
98 localization atlas that is time-dependent, the functions of these factors in nephrogenesis have not yet been  
99 fully elucidated. One uncharacterized gene is *Transcription Factor AP-2 Alpha (TFAP2A)*, which clustered  
100 with developing medial/distal tubule signatures (Lindström et al., 2018b). *TFAP2A* is a member of the AP-2  
101 transcription factor family (AP-2 $\alpha$ , AP-2 $\beta$ , AP-2 $\gamma$ , AP-2 $\delta$  and AP-2 $\epsilon$ ), whose proteins share highly

102 conserved dimerization and DNA binding motifs across vertebrates (Fig. S1). AP-2 factors bind to GC-rich  
103 promoter sequences, and can homodimerize and heterodimerize with one another (Eckert et al., 2005).  
104 During development, these factors have been shown to exercise redundant and unique functions  
105 depending on the tissue context (Eckert et al., 2005).

106  
107 *Tfap2a* and family member *Tfap2b* also have overlapping expression patterns during vertebrate  
108 embryogenesis in neural crest derivatives, surface ectoderm, and the kidney (Moser et al., 1997; Knight et  
109 al., 2003; Knight et al., 2005). Surprisingly, the elimination of *Tfap2a* and *Tfap2b* in mice results in  
110 completely different phenotypic outcomes. *Tfap2a* knockout mice die perinatally and display a suite of  
111 pleiotropic features that include craniofacial alterations, incomplete neural tube closure, hypoplastic hearts  
112 and kidneys (Schorle et al., 1996; Zhang et al., 1996; Brewer and Williams, 2004; Brewer et al., 2004). In  
113 contrast, *Tfap2b* null mice exhibit patent ductus arteriosus and die shortly after birth due to acute renal  
114 failure with elevated apoptosis (Moser et al., 1997; Hilger-Eversheim et al., 2000; Wang et al., 2018).  
115 Because *Tfap2b* mutants exhibit less severe phenotypes, this factor is proposed to share redundant  
116 functions with *Tfap2a* during development (Eckert et al., 2005; Kerber et al., 2001). An example in support  
117 of this relationship is that *Tfap2a* plays a more dominant role than *Tfap2b* in the development of branchial  
118 arches in mice (Van Otterloo et al., 2018).

119  
120 Genetic defects in the AP-2 factors are associated with several human diseases. Autosomal dominant  
121 *TFAP2A* mutations in humans cause branchio-oculo-facial syndrome (BOFS), which primarily affects  
122 craniofacial tissue (Milunsky et al., 2008). Additionally, human *TFAP2A* lesions are associated with  
123 multicystic dysplastic kidney defects, but the mechanisms have remained unexplored. Dominant-negative  
124 mutations in human *TFAP2B* cause Char Syndrome, which affects heart, face, and limb development  
125 (Satoda et al., 2000). Despite the previously documented renal phenotypes associated with *Tfap2a* and  
126 *Tfap2b* deficiency in rodents, these factors have not been studied further in the context of kidney  
127 development. For example, nephron segmentation has not been analyzed in either *Tfap2a* or *Tfap2b*-  
128 deficient murine models. Nevertheless, *Tfap2a/tfap2a* has been extensively studied in the vertebrate  
129 neural crest, where it facilitates specification and differentiation through a complex genetic regulatory  
130 network (Knight et al., 2003; Knight et al., 2005; Holzschuh et al., 2003; Barrallo-Gimeno et al., 2003;  
131 O'Brien et al., 2004; Li and Cornell, 2007; Hoffman et al., 2007; Van Otterloo et al., 2010; de Croz e et al.,  
132 2011; Wang et al., 2011; Bhat et al., 2012; Green et al., 2014; Kantarci et al., 2015; Seberg et al., 2017).  
133 These studies provide a valuable framework with which to consider the roles of *Tfap2a/tfap2a* in other  
134 tissues, where it is likely to also mediate genetic networks.

135  
136 Here, we report the novel zebrafish nephron segment mutant, *terminus (trm)*, which was isolated in a  
137 forward haploid genetic screen. Employing whole genome sequencing, we identified a mutation that blocks  
138 proper splicing of *tfap2a*. While *tfap2a* deficient nephrons have normal distal segment pattern formation,



139 display normal epithelial polarity and cilia development, they experience a block in other aspects of  
140 terminal differentiation, resulting in the loss of solute transporter expression within distal segments.  
141 Interestingly, *tfap2a* is sufficient to induce ectopic expression of distal segment markers in adjacent  
142 segment domains. We found that *tfap2b* functions redundantly and downstream of *tfap2a* to turn on the  
143 distal nephron solute transporter program. Further, *tfap2a* articulates with the Iroquois homeobox  
144 transcription factors *irx1a* and *irx3b*, which are regulators of intermediate/distal nephron identity. Our study  
145 reveals for the first time that *tfap2a* controls a gene regulatory network that serves as a gatekeeper of  
146 terminal differentiation during nephron segment development, and establishes a new paradigm that will be  
147 valuable to deepen our knowledge of cell differentiation mechanisms in the kidney.

148

149

150

151

152

## 153 **Results**

### 154 **Forward genetic screen identifies *tfap2a* as a novel regulator of nephron development**

155 There remain many gaps in our understanding of the genetic blueprint needed to orchestrate renal stem  
156 cell fate decisions and nephron segment formation during kidney ontogeny. The embryonic zebrafish  
157 kidney, or pronephros, is a practical genetic model for nephron segmentation (Gerlach and Wingert, 2013).  
158 At 24 hours post fertilization (hpf), the pronephros is fully formed and exhibits a very simple organization  
159 consisting of two parallel nephrons (Fig. 1A), making cellular changes easy to detect (Poureetezadi and  
160 Wingert, 2016). Each nephron is comprised of a blood filter, a series of proximal and distal segments that  
161 reabsorb and secrete molecules, and a collecting duct to transport waste (Fig. 1A) (Wingert et al., 2007).

162

163 To identify novel renal regulators, we performed a forward genetic haploid screen in zebrafish. We  
164 obtained maternal gametes from the F1 generation, applied ultraviolet light inactivated sperm to generate  
165 F2 haploid embryos, and assayed them for nephron segment defects by whole mount *in situ* hybridization  
166 (WISH) (Kroeger et al., 2014). For our assay we applied a mixture of probes that specifically localize to  
167 alternating compartments of the pronephros: podocytes (*wt1b*), proximal convoluted tubule (PCT)  
168 (*slc20a1a*), and the distal early segment (DE) (*slc12a1*) (Fig. 1B). Through this multiplex assay we isolated  
169 the nephron mutant *terminus* (*trm*) which affected DE segment development based on abrogated *slc12a1*  
170 expression within the pronephros (Fig. 1B).

171

172 We performed whole genome sequencing to identify the causative gene for the *trm* phenotype (Leshchiner  
173 et al., 2012). Using SNP track software analysis, the location of the genetic lesion was mapped to  
174 chromosome 24 (Fig. 1C). We used previously described thresholds to enrich results (Ryan et al., 2013)  
175 and discovered the gene *tfap2a* was a high scoring candidate at the chromosome 24 locus, where there

176 was a G → A substitution that was predicted to disrupt splicing at the splice donor site of exon 1. We  
177 performed direct PCR sequencing on *trm* mutants and wild-type (WT) siblings, and confirmed this genetic  
178 change (Fig. 1C). To characterize how this mutation affected splicing, we conducted transcript analysis.  
179 RT-PCR on total RNA isolated from *trm* mutants revealed four aberrant *tfap2a* spliceoforms compared to  
180 WTs (Fig. 1D). One aberrant transcript encoded an in-frame addition of 38 amino acids (Fig. 1D), which  
181 may possess native function or have dysfunctions associated with protein folding or stability. The other  
182 three transcripts encoded premature stop codons (Fig. 1D). These aberrant *trm* transcripts are predicted to  
183 truncate the essential transcriptional activation and DNA binding domains in the Tfap2a protein (Fig. 1D).

184

185 Next, we explored whether the loss of *tfap2a* function in *trm* mutants was the sole origin of their renal  
186 phenotype. To do this, we performed complementation tests between *trm* and *tfap2a*<sup>m819</sup>, the latter which  
187 encodes a nonsense allele, followed by phenotype assessment with WISH and finally genotyping analysis.  
188 Compound *trm*<sup>+/-</sup>;*tfap2a*<sup>m819+/-</sup> heterozygote embryos displayed the loss of *romk2* expression within the  
189 pronephros DE segment and reduced *dlx2* expression in the neural crest as well (Fig. 1E). This result  
190 indicates that the alleles failed to complement one another, which most likely indicates that the same gene  
191 is affected, and provided powerful evidence that disruption of *tfap2a* expression alone underlies the *trm*  
192 phenotype.

193

194 Until now, *tfap2a* has been known as essential for neural crest and epidermis differentiation. Thus, we  
195 assessed whether *trm* mutants evinced hallmarks of *tfap2a* deficiency. With analysis of live morphology at  
196 4 dpf, we found that *trm* developed abnormal craniofacial cartilage and pericardial edema, which was  
197 phenocopied upon *tfap2a* morpholino knockdown (Fig. 1F). RT-PCR analysis confirmed that this *tfap2a*  
198 MO effectively disrupts splicing (Fig. S2). We examined facial cartilage using Alcian blue staining, where  
199 we found *trm* possesses defects in Meckel's cartilage and pharyngeal arch structures (Fig. 1G). The  
200 cartilage phenotypes observed in *trm* are consistent with the documented neural crest *tfap2a* mutant  
201 alleles *lockjaw* and *mont blanc* (Knight et al., 2003; Barrallo-Gimeno et al., 2003). *trm* also displayed  
202 disrupted craniofacial vasculature formation as indicated by o-dianisidine staining (Fig. S4). Further, when  
203 we assayed for *tfap2a* protein by whole mount immunofluorescence (IF), we detected no pronephric  
204 expression in *trm* mutants as compared to WT at 24 hpf. The absence of *tfap2a* protein expression in the  
205 mutant pronephros indicates that the ultimate consequence of *trm* allele is a bona-fide loss-of-function. In  
206 light of the mutation site, these IF data further indicate that the *tfap2a* exon1c spliceoform encodes the  
207 dominant protein variant that is active during kidney development. In sum, these results show that *trm*  
208 mutants exhibit many features of *tfap2a* deficiency, and reveal for the first time that *tfap2a* is needed for  
209 nephrogenesis—specifically for proper emergence of the DE segment population.

210

211

212 ***tfap2a* and *tfap2b* are coexpressed dynamically during nephron development and function**  
213 **redundantly to induce regimens of distal segment solute transporter genes**

214 Of the AP-2 family of transcription factors, only *tfap2a* and *tfap2b* have been reported as expressed in the  
215 developing zebrafish pronephros (Knight et al., 2005; Sugano et al., 2017). Zebrafish *tfap2a* and *tfap2b*  
216 genes are closely related, as they share overall 65% amino acid sequence identity, with highly similar  
217 DNA-binding and transactivation domains in particular (Knight et al., 2005). The sequence of both *tfap2a*  
218 and *tfap2b* zebrafish genes are conserved with their respective vertebrate orthologues as well (Fig. S1)  
219 (Knight et al., 2005).

220  
221 To further investigate the spatiotemporal expression domains of *tfap2a* and *tfap2b* within the developing  
222 renal field, we performed WISH with RNA antisense riboprobes over the time span of nephrogenesis. We  
223 found that *tfap2a* and *tfap2b* transcripts were expressed broadly in renal progenitors at the 10 somite stage  
224 (ss), however this expression became dynamically restricted to the distal region of the pronephros by the  
225 28 ss (Fig. 2A). Through fluorescent *in situ* hybridization (FISH) studies, we confirmed that *tfap2a* and  
226 *tfap2b* were robustly co-expressed in nearly identical renal progenitor domains at the 10 ss (Fig. 2B). FISH  
227 at the 20 ss and 28 ss revealed that *tfap2a* had a mostly broader expression pattern across the distal  
228 pronephros compared to *tfap2b* (Fig. 2B), consistent with expression in the DE and DL segments.  
229 Differential *tfap2a/b* expression was noted rostrally and in the posterior pronephric duct region at the 20 ss  
230 and 28 ss, where only *tfap2a* transcripts were detected (Fig. 2B). Next, we sought to validate if *tfap2a* was  
231 expressed in the DE segment domain, which is demarcated by *slc12a1* expression, given the *trm* mutant  
232 phenotype (Wingert et al., 2007). *tfap2a* and *slc12a1* transcripts were co-localized at the 28 ss (Fig. 2C).  
233 These results indicate that *tfap2a* and *tfap2b* expression occurs in renal progenitors during a  
234 developmental window that positions them as possible participants in distal nephron development.

235  
236 To explore potential genetic relationships between *tfap2a* and *tfap2b*, we performed loss of function  
237 experiments. *trm* exhibited significantly reduced *tfap2b* expression in the distal pronephros and the  
238 hindbrain region (Fig. 2D). Conversely, knockdown of *tfap2b* using a morpholino (MO) strategy revealed  
239 that *tfap2a* expression was unaffected throughout the embryo, including the pronephros (Fig. 2E). The  
240 *tfap2b* MO tool was verified to interrupt splicing by RT-PCR, which revealed that it caused inclusion of  
241 intronic sequence that encoded a premature stop codon, which is predicted to generate a truncated  
242 peptide (Fig. S3). In combination, these genetic studies suggest a more dominant role of *tfap2a* in the  
243 context of nephrogenesis, placing *tfap2a* upstream of *tfap2b*.

244  
245 Because *tfap2a* and *tfap2b* have been demonstrated to function redundantly in the development of other  
246 tissue types, we next wanted to determine if these two factors could act similarly during nephrogenesis  
247 (Knight et al., 2005; Van Otterloo et al., 2018; Seberg et al., 2017; Bassett et al., 2012; Jin et al., 2015). To  
248 interrogate this, we performed combination knockdown studies and assayed a set of solute transporters

249 that characterize the distal nephron segments at 24 hpf (Fig 3A). *tfap2b* deficiency alone had no detectable  
250 affects on distal solute transporter expression. *trm* and *tfap2a* morphants exhibited significant reductions in  
251 *slc12a1*, *slc12a3*, and *clcnk* expression as compared to WT (Fig. 3A,B,C,D). At 4 dpf, *trm* mutants still  
252 failed to express distal early solute transporters *slc12a1* and *romk2* (Fig. S4). However, the pronephros  
253 was functional between 2 and 3 dpf, based on assessment of renal clearance, which normally initiates  
254 during this time period, thereby ruling out developmental delay (Fig. S4). Knockdown of *tfap2b* in *trm*  
255 mutants caused a more severe *slc12a3* reduction than *tfap2a* deficient embryos (Fig. 3). Interestingly,  
256 there was not a statistically significant reduction in the *slc12a1* or *clcnk* domain length in *tfap2b* injected  
257 *trm* mutants versus *tfap2a* deficiency alone (Fig. 3). By comparison, *tfap2a/2b* morphants had statistically  
258 significant reduction of the *slc12a1*, *slc12a3*, and *clcnk* pronephros expression domains versus *tfap2a*  
259 deficiency alone. Notably, *tfap2a* morpholino targets all three splice variants, however the *trm* mutation  
260 only affects one of these splice variants (Fig. 1C). In light of this phenotypic spectrum, we concluded that  
261 the development of the distal nephron program is sensitive to the dosage of functional *tfap2a/2b* alleles  
262 that are present. Taken together, these genetic studies reveal that the concerted action of *tfap2a* and  
263 *tfap2b* is necessary to fully turn on distal solute transporter programs, where *tfap2a* plays a more  
264 prominent role in this process upstream of *tfap2b*.

265

266

### 267 ***tfap2a* is necessary and sufficient for DE differentiated cell expression signature**

268 Next, we wanted to determine if provision of WT *tfap2a* transcripts could specifically rescue the absence of  
269 DE solute transporter expression in *trm*. Activation of a heat-shock inducible *tfap2a* transgene at the 8 ss  
270 restored *romk2* expression in *trm* mutants comparable to WT levels based on absolute length  
271 measurements (Fig. 4A). This result further underscores the conclusion that *tfap2a* deficiency is the single,  
272 specific cause of the *trm* phenotype. We then performed *tfap2a* gain of function studies by two  
273 independent methods: 1) employing an inducible *hs:tfap2a* transgenic line and 2) microinjection of *tfap2a*  
274 mRNA in WT embryos. When we overexpressed *tfap2a* by these approaches there was a significant  
275 expansion of the *romk2* expression domain which normally marks the DE segment (Fig. 4B). All of the  
276 heat-shock treated *hs:tfap2a* transgenic embryos exhibited an expanded *romk2* domain, while control non-  
277 heat-shocked embryos developed normal *romk2* domains. About 9% (12/132) of the *tfap2a* cRNA injected  
278 clutches presented with an increased *romk2* domain, however about 64% (85/132) of embryos were  
279 scored as dysmorphic. This lower phenotype penetrance, compared to the transgenic overexpression  
280 model, is likely caused by the toxic affects of *tfap2a* during early development, which has been reported to  
281 disrupt gastrulation (Li and Cornell, 2007). Interestingly, ectopic *romk2*<sup>+</sup> cells appeared to invade both the  
282 adjacent proximal and distal segment domains in these gain-of-function experiments.

283

284 To examine more closely if *tfap2a* overexpression was inducing neighboring nephron segments to convert  
285 to a DE program, we performed double FISH on heat-shocked *hs:tfap2a* embryos. We detected *slc12a1*<sup>+</sup>

286 cells within the *slc12a3*<sup>+</sup> DL domain (Fig. 4C). Upon closer analysis, these cells were found to coexpress  
287 both *slc12a1* and *slc12a3* transcripts (Fig. 4C'). Heat-shocked *hs:tfap2a* animals also possessed *slc12a1*<sup>+</sup>  
288 cells spanning across the proximal domain that were coexpressing *slc9a3* (Fig. 4D,D'). These phenotypes  
289 greatly contrast the WT situation, where there are sharp, clear boundaries between neighboring segment  
290 domains in the nephron (Fig. 4C,D). These results indicate that *tfap2a* overexpression is sufficient to sway  
291 the differentiation profile of proximal and distal late cell types by triggering the misexpression of DE-  
292 specific solute transporters.

293

294

### 295 ***tfap2a* drives DE terminal differentiation program**

296 Previous studies have demonstrated *tfap2a* can regulate terminal differentiation of various cell types  
297 including migratory neural crest, melanocytes, statoacoustic ganglion neurons, noradrenergic neurons, and  
298 the trophoblast lineage (Barrallo-Gimeno et al., 2003; Kantarci et al., 2015; Seberg et al., 2017; Greco et  
299 al., 1995; Kim et al., 2001; Pfisterer et al., 2001; Handwerger, 2009). This literature, in light of our loss of  
300 function and gain of function results, led us to hypothesize that *tfap2a* controls the terminal differentiation  
301 of distal nephron cells. To explore this notion, we first wanted to determine if the nephron segments were  
302 patterned correctly in *trm* mutants.

303

304 To assess the pattern formation of nephron segments in *trm* mutants, we performed double WISH to  
305 assess the segment domains located adjacent to the DE, in this case the pan-proximal and DL. *trm*  
306 mutants exhibited a domain of *slc9a3* expression comparable to WT embryos (Fig. 5A). In both WT and  
307 *trm*, this *slc9a3*<sup>+</sup> region was followed by a gap situated at the position normally occupied by the DE  
308 segment, and the *slc12a3* expression domain, which is smaller in *trm* mutants, immediately followed this  
309 gap (Fig. 5A). The intact sequence of the pan-proximal, gap/placeholder, and then the DL segment  
310 suggested that the DE segment 'footprint' was present in *trm* mutants, and thus that pattern formation had  
311 proceeded during nephrogenesis (Fig. 5A). Additionally, *trm* mutants exhibited no alterations in *slc20a1a*  
312 or *trpm7* expression domains, which mark the PCT and PST segments, respectively (Fig. S5). *tfap2a*  
313 morphants also developed normal proximal segments, as well as the DE footprint (data not shown). These  
314 results indicate that *tfap2a* deficient embryos undergo normal segmental patterning of the nephron tubule.

315

316 We then examined development of the corpuscle of Stannius in *trm* mutants, which is an endocrine gland  
317 situated between the DE and DL (Cheng and Wingert, 2015). We used WISH to assess the expression of  
318 transcripts encoding *stanniocalcin 1* (*stc1*), a specific CS marker. Compared to WT embryos, *trm* mutants  
319 exhibited severely reduced *stc1* expression (Fig. S5). In sum, these data rule out the occurrence of  
320 possible fate switches with adjacent nephron cell types that could account for the loss of the DE marker  
321 expression, and suggest that in addition to the DE, *tfap2a* may regulate CS lineage development and/or  
322 CS differentiation.



323

324 Next, we wanted to determine if *trm* mutant cells occupying the DE region were specified as kidney. To do  
325 this, we individually assayed for the expression of genes that are expressed robustly throughout the entire  
326 nephron tubule. Identical to WT embryos, *trm* mutants showed no gaps in expression of *cdh17* and *hnf1ba*,  
327 illustrating that mutant DE cells were fated to a kidney lineage identity (Fig. 5B). Further, we assessed if  
328 any alterations in cell proliferation or cell death occurs in response to loss of *tfap2a*. We detected no visible  
329 changes in the number of pH3<sup>+</sup> cells within the DE domain of *trm* mutants compared to WT controls at 24  
330 hpf (Fig. 5C). Additionally, there were no perceivable differences in the number of dying cells labeled with  
331 acridine orange in the distal pronephros compared to WTs at 24 hpf (Fig. 5D).

332

333 Renal progenitor differentiation in the zebrafish pronephros is known to entail an MET of the mesenchymal  
334 progenitors, with establishment of polarity and lumen formation, as well as changes in cellular organelles  
335 such as cilia. Therefore, we sought to determine whether *trm* mutant DE cells exhibited any of these  
336 various differentiated features of the nephron tubular epithelium. Differentiated pronephros cells exhibit  
337 apical-basal polarity and form either a primary cilium or multiple cilia by the 24 hpf stage (Gerlach and  
338 Wingert, 2013, 2014; McKee et al., 2014; Marra and Wingert 2016; Marra et al., 2016). We performed  
339 whole mount IF to analyze the expression of basolateral marker Na,K-ATPase and the apical adaptor  
340 complex aPKC in the distal early region at 4 dpf. We found Na,K-ATPase and aPKC proteins were  
341 properly localized in *trm* mutants as compared to WT, therefore indicating that epithelial polarity was  
342 correctly established within the nephron tubules (Fig. 5E,E'). Further, *trm* mutants had a clearly discernible  
343 tubule lumen, indicating that tubulogenesis had proceeded analogous to WT embryos (Fig. 5E,E'). Next,  
344 we combined FISH of *slc12a1* with whole mount IF of acetylated tubulin to determine if cilia formation  
345 occurs within the mutant DE segment region. At 24 hpf, cilia arrangement and morphology in *trm* mutants  
346 was comparable to WT (Fig. 5F). This indicates that cilia assembly occurred normally in the mutant DE  
347 cells, which were visualized based on their nearly abrogated *slc12a1* signal (Fig. 5F). Taken together,  
348 these data indicate that mutant DE cells exhibit mature epithelial qualities, however cannot fully turn on  
349 specific solute transporters, which are indicators of terminal differentiation and ultimately dictate segment-  
350 specific physiological functions. From this, we conclude that *trm* mutants exhibit a unique block in the  
351 terminal differentiation of distal nephron cells, which involves the acquisition of segment-specific solute  
352 transporter proteins but is not linked to MET, polarity establishment, tubulogenesis or ciliogenesis  
353 programs.

354

355

### 356 ***tfap2a* functions downstream of *irx3b* and upstream of *irx1a* in the distal pronephros**

357 We next wanted to understand the genetic relationship of *tfap2a* with known segment patterning factors, to  
358 establish the hierarchical regulation of *tfap2a* during distal segment development. Previous studies have  
359 shown *Ir3/irx3b* are required for the development of *slc12a1*<sup>+</sup> distal tubule cells in *Xenopus* and zebrafish,



360 respectively (Wingert and Davidson, 2008; Reggiani et al., 2007; Marra and Wingert, 2014). Because of  
361 this requirement, we first selected *irx3b* as a putative *tfap2a* gene regulatory network candidate for  
362 investigation.

363

364 To determine if *tfap2a* and *irx3b* are co-expressed during pronephros development, we performed double  
365 FISH studies. We found *tfap2a* and *irx3b* transcripts were co-localized in developing distal nephron cells at  
366 the 20 ss (Fig. 6A). Because of the *tfap2a/irx3b* overlapping expression patterns, we rationalized that these  
367 factors could be interacting in the same developmental pathway. Therefore, we performed knockdown  
368 experiments to determine potential pathway interactions between *tfap2a* and *irx3b*. Upon *tfap2a*  
369 knockdown, the *irx3b* expression domain was unchanged (Fig. 6B). However, upon *irx3b* knockdown, the  
370 *tfap2a* expression domain was significantly truncated (Fig. 6B,C). The regional loss of *tfap2a* transcripts in  
371 *irx3b* morphants equates to the DE segment address. We also observed a loss of *tfap2a* expression in  
372 migrating neural crest streams in *irx3b* morphants (Fig. 6B). To further validate if *tfap2a* acts downstream  
373 of *irx3b*, we performed rescue experiments in *irx3b* morphants. Overexpression of the *hs:tfap2a* transgene  
374 was unable to rescue *romk2* expression in *irx3b* knockdowns (data not shown). We postulate this is  
375 because *irx3b*-deficiency causes loss of *hnf1ba* expression within the DE progenitor compartment,  
376 therefore these cells are not competent to respond to Tfp2a activity (Naylor et al., 2013). These results  
377 suggest that *tfap2a* activates the DE program downstream of *irx3b*.

378

379 Previous literature has determined *Irx1* and *Irx3* are dually required for *Xenopus* pronephros development  
380 (Reggiani et al., 2007; Alarcon et al., 2008). Importantly, loss of *Irx1* in *Xenopus* results in proximal  
381 downregulation of the *Nkcc2* expression domain, the *slc12a1* equivalent in zebrafish (Reggiani et al.,  
382 2007). Therefore, we chose Iroquois homeobox family member, *irx1a*, as another important molecular  
383 player for analysis. In WT embryos, *irx1a* transcript expression was primarily localized to the DE segment  
384 (Fig. 6D) (Cheng et al., 2001). In *trm* mutants and *tfap2a* morphants, *irx1a* expression was nearly  
385 abrogated, with only a few remaining nephron cells expressing transcripts (Fig. 6D). When we induced  
386 overexpression of *tfap2a* at the 8 ss, the *irx1a* expression domain length was significantly expanded,  
387 indicating that *tfap2a* functions to activate *irx1a* expression directly or indirectly (Fig. 6E,F). Our results  
388 place *tfap2a* function with respect to *irx* activity, indicating that *tfap2a* functions downstream of *irx3b* and  
389 upstream of *irx1a* during distal segment differentiation. Taken together, our genetic analyses suggest a  
390 working model in which *tfap2a* coordinates a genetic regulatory network, likely through direct and indirect  
391 interactions, that controls the differentiation of distal nephron progenitors (Fig. 7).

392

393

394

395

396

## 397 Discussion

398 Here, we have shown that *tfap2a* is required for distal nephron segment differentiation. We propose a  
399 model in which *trm* mutant cells progress through normal nephron developmental checkpoints until the  
400 final stage of differentiation (Fig. 7A). Our data supports the conclusion that *tfap2a* deficiency does not  
401 affect the derivation of the kidney lineage from intermediate mesoderm, as the expression of *hnf1ba* and  
402 *cdh17* are unaffected. Further, we found that *trm* undergo nephron specification and epithelialization, as  
403 *tfap2a*-deficient cells exhibit segmental patterning, proper localization of polarity proteins, and form cilia.  
404 However, mutant cells appear to be frozen nonetheless in a specified renal precursor state, as they fail to  
405 turn on the suite of terminal differentiation genes that encode the distal solute transporters *slc12a1*, *romk2*,  
406 and *clcnk*. Taken together, we conclude that *tfap2a* is required for a discrete genetic circuit during terminal  
407 differentiation of the distal nephron epithelium.

408  
409 Interestingly, this discovery disentangles the control of the solute transporter transcriptome from other  
410 differentiation processes, such as MET and polarity establishment in renal progenitors. Additionally, we  
411 have assembled a proposed Tfab2 genetic circuit that functions to achieve differentiation of distal nephron  
412 epithelium within the zebrafish embryonic kidney (Fig. 7B). In this network, *tfap2a* functions upstream of  
413 *tfap2b* as indicated by our genetic analyses. However, both *tfap2a* and *tfap2b* function synergistically in  
414 renal progenitors to turn on distal solute transporter genes, a level of redundancy that likely serves to  
415 amplify and reinforce this specific differentiation signal. This model is supported by the findings that  
416 elimination of *tfap2a* alleles led to defects in solute transporter expression, however elimination of *tfap2b*  
417 alleles alone had no consequence. Compound knockdown of *tfap2a* and *tfap2b* yielded the most severe  
418 phenotype, unveiling this layer of functional redundancy. As the *trm* mutation affects only one of the *tfap2a*  
419 spliceforms, it is interesting that disrupting only this transcript results in a kidney phenotype, and suggests  
420 it encodes the sole protein variant that is fundamental for kidney development. The current study does not  
421 reconcile whether *tfap2a* and *tfap2b* are interacting by direct or indirect modes of regulation, and whether  
422 the suite of targets are direct or indirect (Fig. 7B). For example, it is possible *tfap2a* binds to the *tfap2b*  
423 promoter region functioning as a transcriptional activator. It is also feasible Tfab2a heterodimerizes with  
424 Tfab2b affecting the transcription of downstream target genes accordingly. These potential biochemical  
425 mechanisms are crucial areas for future investigation.

426  
427 Further, our genetic model supports the conclusion that *tfap2a* acts in the same pathway as Iroquois  
428 homeobox genes *irx3b* and *irx1a*. Our genetic experiments indicate *irx3b* promotes *tfap2a* expression, and  
429 *tfap2a* functions upstream of *irx1a* (Fig. 7). These genes have been previously implicated as necessary for  
430 intermediate-distal early nephron development in zebrafish and frogs (Wingert and Davidson, 2011;  
431 Reggiani et al., 2007). Importantly, Iroquois factors likely play conserved roles in mammalian counterparts,  
432 as *Irx3* and *Irx1* define intermediate segment territories in developing S-shaped bodies (Reggiani et al.,

433 2007). Defining whether *Ir3b* directly regulates *Tfap2a*, and if *Tfap2a* directly regulates *irx1a*, will also be  
434 important to discern in future studies as well.

435

436 Additionally, we discovered an intriguing phenotype when we globally overexpressed *Tfap2a*, where  
437 *slc9a3*<sup>+</sup> proximal tubule and *slc12a3*<sup>+</sup> distal late tubule cells ectopically coexpress *slc12a1*, a marker of the  
438 DE tubule program (Fig. 5). This indicates that renal progenitors are competent to respond to *Tfap2a*,  
439 which is sufficient to activate the DE differentiation circuit. These mixed segment identities induced by  
440 *Tfap2a* gain of function parallels a phenotype recently described as 'lineage infidelity,' which was observed  
441 in differentiating nephrons of *Hox9,10,11*-knockout mice (Magella et al., 2018; Drake et al., 2018). These  
442 studies similarly found individual cells that were dually expressing markers of more than one nephron  
443 segment. Specifically, in E18.5 *Hoxa9,10,11/Hoxd9,10,11*-deficient kidneys, cells were scattered  
444 throughout *Hnf4a*<sup>+</sup> proximal tubules co-expressing collecting duct markers *DBA* and *Krt8*. Strikingly, mutant  
445 kidneys sometimes possessed entire *Slc12a1*<sup>+</sup> ascending loop of Henle (the DE analog in zebrafish)  
446 domains that co-labeled with *Krt8*. These developing mutant nephrons undergo a normal segment  
447 specification phase (E15.5), but later fail to maintain appropriate differentiation programs. It is an  
448 interesting prospect that *Hox* mutants exhibit a normal specification phase, as our data similarly suggests  
449 that *Tfap2a* is dispensable for nephron patterning, but necessary for inducing a proper differentiation state.  
450 During zebrafish neural crest development, *Tfap2a* promotes expression of *Hox* group 2 genes to form  
451 segments of the pharyngeal skeleton (Knight et al., 2003; Barrallo-Gimeno et al., 2003). Collectively, these  
452 studies warrant *Hox* genes as important future areas of study regarding the *Tfap2* genetic regulatory  
453 network controlling nephron differentiation.

454

455 With the advent of next-generation sequencing technologies, recent work in the field has identified new  
456 targets within the *Tfap2* genetic regulatory network (Seberg et al., 2017). To do this, microarray analyses  
457 and ChIP-seq were employed in tandem to identify novel players regulating melanocyte development  
458 within the *Tfap2a* GRN. To collect candidates, microarray analysis of *Tfap2a*<sup>-/-</sup> zebrafish trunks and *Tfap2a*-  
459 deficient mouse melanocyte lines were conducted. Microarray results were compared to ChIP-Seq data  
460 gathered from mouse and human melanocytes to determine which differentially regulated genes were  
461 direct transcriptional targets of *Tfap2a*. The findings suggested *Tfap2a* directly regulates effectors of  
462 melanocyte terminal differentiation (e.g. *dct*, *mlpha*, *mc2r*, *sox10*, *mitf*). Conducting microarray analysis of  
463 our *trm* mutant zebrafish embryos and overlapping this data with the previously published mammalian  
464 kidney *Tfap2a* Chip-Seq data set (Pihlajamaa et al., 2014) will help to identify putative direct targets  
465 governing terminal differentiation of distal nephron cells.

466

467 A separate study performed RNA-sequencing analysis on dissected mandibular processes from double  
468 conditional *Tfap2a/Tfap2b* mouse mutant embryos to find *Tfap2a/2b* target genes during branchial arch  
469 patterning (Van Otterloo et al., 2018). Upon evaluating differentially expressed genes by Geneset

470 enrichment analyses (GSEAs) 'homeobox transcription factors' was identified as the number one over-  
471 represented cluster. Further genetic workup of *Dlx*, *Msx*, and *Emx* homeobox gene families established  
472 these factors as major network targets under the control of *Tfap2a/b* during branchial arch development.  
473 Performing RNA-profiling and GSEAs of *tfap2a*-deficient developing nephrons would aid in pinpointing  
474 molecular pathways for future workup. The majority of differentially expressed genes in *Tfap2a/2b* murine  
475 branchial arches were associated with regions corresponding to poised histone marks, supporting a direct  
476 mode of regulation (Van Otterloo et al., 2018). However, it remains a possibility that *tfap2a* regulates  
477 transcription in nephron precursors via an intermediate factor or chromatin modifier as part of the GRN. In  
478 further support of an indirect mode of regulation, *Tfap2a* acts as a tissue-specific pioneer factor in the  
479 epididymis to modify chromatin structure activating androgen receptor signaling (Pihlajamaa et al., 2014).  
480 We speculate that *Tfap2a/b* operates both directly and indirectly to regulate expression of GRN  
481 components responsible for terminal differentiation of distal nephron tubules. To entertain this prospect,  
482 ATAC-seq and ChIP-seq methods could be installed in the future to determine differential chromatin  
483 accessibility in *tfap2a*-deficient renal progenitors.

484

485 *Tfap2a* has roles in induction, early specification, patterning, cell survival, and differentiation depending on  
486 the tissue type (Eckert et al., 2005). In neural crest, *tfap2a* plays dual roles in early development and later  
487 differentiation events. *tfap2a* and *foxd3* establish proper Bmp and Wnt signaling, which is required for early  
488 neural crest induction (de Croze et al., 2011; Bhat et al., 2012). In *tfap2a*-deficiency, migratory neural crest  
489 cells undergo increased apoptosis, indicating *tfap2a* is necessary for survival. It is speculated that because  
490 these cells cannot differentiate properly, they undergo apoptosis (Knight et al., 2003). Further, *tfap2a* is  
491 required for the specification and differentiation of inner ear neurons (Kantarci et al., 2015). *tfap2a* is also a  
492 necessary element for establishing preplacodal ectoderm competence and specification of ectoderm  
493 lineages (Bhat et al., 2012; Kwon et al., 2010). The concerted action of *tfap2a* and *phox2a* promote the  
494 differentiation of noradrenergic neurons in the central nervous system (Holzschuh et al., 2003). *tfap2a* also  
495 stimulates pathways that promote melanocyte terminal differentiation and survival (Van Otterloo et al.,  
496 2010; Seberg et al., 2017). *tfap2a* and *tfap2b* are required for the survival of sympathetic progenitors and  
497 differentiated sympathetic neurons (Schmidt et al., 2011). Differentiation of amacrine cells during  
498 retinogenesis is also induced by *tfap2a* and *tfap2b* (Bassett et al., 2012; Jin et al., 2015), and they function  
499 redundantly and non-autonomously to regulate cartilage patterning by modulating Fgf signals in the  
500 pharyngeal ectoderm (Knight et al., 2005). Interestingly, in the developing mouse kidney, *Tfap2b* is  
501 required for the maintenance and survival of renal epithelium (Moser et al., 1997). In *Tfap2b* null mice,  
502 distal tubules and collecting duct cells undergo a massive wave of apoptosis. Additionally, histology  
503 revealed mutant kidneys possess numerous cysts in the distal tubules and collecting ducts. Anti-apoptotic  
504 genes *bcl-X<sub>L</sub>*, *bcl-w*, and *bcl2* are strongly downregulated, supporting the idea that *Tfap2b* programs cell  
505 survival during embryogenesis. However, in our *trm* mutant, we are confident cell death does not  
506 contribute to the decreased solute transporter expression observed. Upon acridine orange analysis, we

507 saw no obvious increase in the number of dying cells. Further, we observe no gaps in the nephron tubule  
508 as a result of dying cells, as indicated by continuous expression of *cdh17* expression at 24 hpf or at later  
509 time points. Our data strongly suggests that the main function of *tfap2a* and *tfap2b* during nephron  
510 development is not specification, patterning, or survival, but rather to promote terminal differentiation of  
511 distal nephron epithelium.

512

513 Based on recent studies in the zebrafish model, upstream candidates for regulating *tfap2a* and *tfap2b* may  
514 occupy the prostaglandin signaling pathway, which is essential to control the balance of DE and DL  
515 territories during zebrafish nephrogenesis (Poureetezadi et al., 2016), or include transcription factors like  
516 *mecom*, *tbx2a/2b*, or *emx1* that regulate DL development (Li et al., 2014; Drummond et al., 2016; Morales  
517 et al., 2018). Additional network candidates which may crosstalk with *tfap2a/2b* include *sall1* and *sox11*. In  
518 mammals *Sall1* has been found to be a critical factor in the development of the thick ascending limb (TAL),  
519 which is the segment analogous to the zebrafish DE region (Basta et al., 2017). *Sall1* mutants exhibited  
520 significantly decreased expression of *Kcnj1* (*Romk2*), *Slc12a1*, *Irx2*, and *Pou3f3*, among other major loop  
521 of Henle and distal lineage genes. Immunohistochemistry analysis revealed a near total loss of *Slc12a1*<sup>+</sup>  
522 loop of Henle structures in the inner medulla of mutant embryos. In the murine kidney, *Sox11* is also  
523 necessary for proper loop of Henle ontogeny (Neirijnck et al., 2018). *Sox11*-deficient kidneys have  
524 significantly reduced expression of *Slc12a1*, *Irx1*, and *Irx2*. *Sall1* and *Sox11* are excellent candidates to  
525 situate in the *Tfap2a* GRN, due to their involvement in the DE/TAL segment development. Additionally,  
526 *Sall1*, *Sox11*, and *tfap2a* mutations all reduce *Irx* gene expression, suggesting they may act in the same  
527 pathway.

528

529 Knowledge about the terminal differentiation programs of each nephron segment has central importance  
530 for understanding kidney disease and to advance regenerative medicine. Human BOFS is associated with  
531 the occurrence of dysplastic kidneys, but the underlying mechanisms are not known. Our zebrafish *trm*  
532 mutant provides an opportunity to model aspects of BOFS at the molecular level of the nephron. With  
533 regard to kidney engineering, current groups face major challenges of generating mature, differentiated  
534 nephron structures in kidney organoid cultures (Hariharan et al., 2015; Chambers et al., 2016; Oxburgh et  
535 al., 2017; Takasato et al., 2017). However, growing mouse and particularly human kidney organoids is an  
536 immensely promising technology to study kidney development, model renal disease, and perform  
537 nephrotoxicity assays (Morizane and Bonventre, 2017). Reconstructing the mammalian nephron requires  
538 understanding the correct signals to guide stem cells down the appropriate differentiation paths to  
539 generate highly specialized compartments of cells. While terminally differentiated nephrons have yet to be  
540 achieved in organoid cultures, the discovery of terminal differentiation factors, like *tfap2a* and *tfap2b*, can  
541 herald progress in this crucial aspect of the kidney organoid field. In sum, our work indicates that further  
542 elucidation of the *Tfap2a/TFAP2A* gene regulatory network in zebrafish, murine, and human nephron  
543 progenitors can shed valuable insights into nephron differentiation and congenital renal disease.



544 **Materials and Methods**

545

546 **Ethics statement and zebrafish husbandry**

547 Adult zebrafish were maintained in the Center for Zebrafish Research at the University of Notre Dame  
548 Freimann Life Science Center. All studies were performed and supervised with by the University of Notre  
549 Dame Institutional Animal Care and Use Committee (IACUC), under protocol numbers 13-021 and 16-025.  
550 Tübingen strain animals were used for WT experiments. Zebrafish embryos were raised in E3 embryo  
551 media, staged, and fixed as described (Kimmel et al., 1995).

552

553 **Whole mount and fluorescent *in situ* hybridization (WISH, FISH)**

554 WISH and FISH were performed as described (Marra et al., 2017; Brend and Holley, 2009; Lengerke et al.,  
555 2011; Cheng et al., 2014) with antisense RNA probes. Probes were synthesized using IMAGE clone  
556 template plasmids for *in vitro* transcription (Wingert et al., 2007; Wingert and Davidson, 2011).  
557 Digoxigenin-labeled probes consist of: *wt1b*, *slc20a1a*, *slc12a1*, *dlx2a*, *romk2*, *tfap2a*, *tfap2b*, *clcnk*,  
558 *slc12a3*, *slc9a3*, *cdh17*, *hnf1ba*, *irx3b*, *irx1a*, *trpm7*, and *stc1*. Fluorescein-labeled probes consist of:  
559 *tfap2b*, *slc12a1*, *slc12a3*, *tfap2a*. For all gene expression studies, each analysis was performed in triplicate  
560 with sample size of at least n=20 for each replicate. Representative animals were imaged and absolute  
561 length measurements were collected.

562

563 **Whole mount immunofluorescence (IF)**

564 Whole mount IF studies were completed as described (McC Campbell et al., 2015). To assess Tfap2a  
565 protein expression, anti-tfap2a (1:50) (LifeSpan Biosciences) and anti-goat secondary antibody were used.  
566 To analyze proliferation, anti-phospho-Histone H3 (1:200) (Millipore), and anti-rabbit secondary antibody  
567 (Alexa Fluor, Invitrogen) were used (Kroeger et al., 2017). For cilia studies, anti-acetylated  $\alpha$ -tubulin  
568 (1:400) and anti-mouse secondary antibody (Alexa Fluor, Invitrogen) were used (Marra et al., 2017).  
569 Monoclonal  $\alpha$ 6F anti-NaKATPase (1:35) (Developmental Studies Hybridoma Bank) and anti-aPKC (1:250)  
570 (Santa-Cruz) were applied to embryos incubated in 0.003% PTU to prevent pigmentation and fixed in  
571 Dent's solution (80% methanol, 20% DMSO) overnight at 4°C (Gerlach and Wingert, 2014). Anti-mouse  
572 and anti-rabbit secondary antibodies (Alexa Fluor, Invitrogen) were used respectively. All fluorescently-  
573 conjugated secondary antibodies were applied at a 1:500 dilution, and 4,6-diamidino-2-phenylindole  
574 dihydrochloride (DAPI) (Invitrogen) was used to stain nuclei.

575

576 **Image acquisition and statistical analysis**

577 A Nikon Eclipse Ni with DS-Fi2 camera was used to image WISH samples. A Nikon C2 confocal  
578 microscope was used to image whole mount FISH and IF samples. The polyline tool in Nikon Elements  
579 imaging software was used to measure gene expression domains. A minimum of 3 representative samples



580 for each control and experimental group were imaged and measured. Averages and standard errors were  
581 calculated. Unpaired t-tests or one-way ANOVA tests were completed for statistical analyses.

582

### 583 **Mutagenesis, whole genome sequencing and genotyping**

584 WT zebrafish were exposed to ethylnitrosurea and haploids generated as described (Kroeger et al., 2014).  
585 Whole genome sequencing was performed as described (Leshchiner et al., 2012). Pools of 20 *trm* mutants  
586 and 20 WT siblings were identified by WISH analysis for *slc12a1* (DE) expression. DNA isolation was  
587 conducted using the DNAeasy blood and tissue kit (Qiagen). WGS results were interpreted by SNPtrack  
588 software (Leshchiner et al., 2012; Ryan et al., 2013). Isolation of genomic DNA from individual *trm* animals  
589 was performed and PCR amplification of the *tfap2a* locus was completed using the following primers:

590 forward 5'-

591 TTTGAACGCTGGCCACCGCCACCTCGCCCTACAATTATTGTTGGCTTGATTTAATTTGCACGTTTCGTTT

592 TTGATTTGTCCTTCTGAATTTACGTCTTTT-3' reverse 5'

593 AAATGTTTGGTTTTTCGTTTACCAGTTAAAATCCTACCGAAAGGCAAAGGAAATTAACAATTAACCACAG

594 CTCACATGAAGAAAATCTTTGTAATAGCCTT-3'. For all studies, *trm* mutants were confirmed by

595 genotyping and/or abrogated *dlx2* expression. The QIAquick PCR Purification Kit was used to purify PCR

596 product and sequenced with the forward primer by the University of Notre Dame Genomics Core Facility.

597 Genotyping of *hs:tfap2a* transgenic (*Tg(hsp70:tfap2a)<sup>x24</sup>*, which was a generous gift from Bruce Riley, was

598 conducted by performing PCR amplification (34 cycles, 60°C annealing) of the transgene and running

599 product on a 1% agarose gel. The following primers were used: forward 5'-CTCCTCTCAATGACAGCTG-3'

600 reverse 5'-ATGGCGGTTGGAAGTCTGAA-3'.

601

### 602 **Overexpression experiments**

603 To activate the heat-shock inducible *tfap2a* transgene, heterozygous transgenic embryos were incubated

604 at 38°C for 30 minutes as described (Bhat et al., 2012; Kantarci et al., 2015). For rescue and gain-of-

605 function studies, transgenic embryos were heat shocked at the 8ss. For FISH gain-of-function studies,

606 transgenic embryos were heat shocked at the 10ss. For cRNA synthesis, the open reading frame of *tfap2a*

607 was subcloned into the pCS2 vector. The primers used for subcloning were: forward 5'-

608 GATCATCGATGCCGCCACCATGTTAGTGACAGTTTTTCCGCGATGGATC-3' reverse 5'-

609 GATCTCTAGATCACTTTCTGTGCTTCTCATCTTTGTCACC-3'. For *in vitro* transcription, *tfap2a* template

610 was linearized using Not1 restriction enzyme. Runoff reactions were performed using the mMessage

611 mMachine Sp6 kit (Ambion). 50 picograms (pg) of *tfap2a* cRNA were injected into 1 cell stage embryos.

612

### 613 **Morpholino knockdown and RT-PCR**

614 All morpholino oligonucleotides were synthesized by Gene Tools, LLC. *tfap2a* MO-splice (*tfap2a* MO4)

615 targets the exon 2 – intron 2 splice site: 5'-AGCTTTTCTTCTTACCTGAACATCT-3' [36]. *tfap2b* MO-splice

616 (*tfap2b* MO1) targets the exon 4 – intron 4 splice site: 5'-GCCATTTTTCGACTTCGCTCTGATC-3' (Knight

617 et al., 2005). *irx3b* MO-ATG (*irx3b* MO2) targets the start site: 5'-ATAGCCTAGCTGCGGGAGAGACATG-  
618 3'. Morpholinos were solubilized in DNase/RNase free water to create 4mM stock solutions and stored at -  
619 20°C. The stocks were diluted as follows for microinjection: *tfap2a*-MO 1:12, *tfap2b*-MO 1:10, *irx3b* MO  
620 1:10. 1-cell stage embryos were injected with approximately 3 nl of morpholino. All splice-blocking MOs  
621 were verified by RT-PCR. Transcript analysis of *tfap2a* and *tfap2b* splicing in WT, WT sibs, *trm* mutants,  
622 *tfap2a* morphants, and *tfap2b* morphants was performed using RT-PCR (Galloway et al., 2008). In brief,  
623 RNA was isolated from pools of about 20 embryos, cDNA was synthesized using random hexamers  
624 (Superscript IV, Invitrogen), and PCR was performed with the following primers. *trm* mutant transcript  
625 analysis: forward 5'-GCATTGCATCTAA-AGGGCAGACGAA-3' reverse 5'-  
626 TAAGGGTCCTGAGACTGCGGATAGA- 3'. *tfap2a* MO-splice transcript analysis: forward 5'-  
627 CCCTATCCATGGAATACCTCACTC-3' reverse 5'-GATTACA-GTTTGGTCTGGGATGTGA-3'. *tfap2b* MO-  
628 splice transcript analysis: forward 5'-AGTGC-CTGAACGCGTCTCTGCTTGGT-3' reverse 5'-  
629 TGACATTGCTGCCTTGCGTCTCC-3'. For *tfap2a* MO and *tfap2b* MO transcript analysis, bands were  
630 gel-extracted, purified, and sequenced. For *trm* mutant transcript analysis, bands were gel-extracted,  
631 purified, and cloned into the pGemTEasy vector (Promega), and minipreps were sequenced.  
632

### 633 **Alcian blue staining and o-dianisidine staining**

634 Alcian blue cartilage staining was performed as previously described (Neuhauss et al., 1996). In brief,  
635 larvae were fixed at 4 dpf for 2 hours at RT in 4% PFA. Larvae were bleached for 1 hour in 10% KOH, 30%  
636 H<sub>2</sub>O<sub>2</sub>, 20% Tween diluted in distilled water. Samples were digested with proteinase K (10 mg/mL) diluted to  
637 1X for 20 minutes. Samples were stained in 0.1% Alcian Blue (Sigma) dissolved in 70% ethanol / 5%  
638 concentrated HCl overnight, shaking at RT in glass vials. Larvae were destained using acidic ethanol for 4  
639 hours, dehydrated by an ethanol series, and stored in glycerol. O-Dianisidine staining was performed as  
640 described on 4 dpf larvae to visualize blood and vasculature (Wingert et al., 2004).  
641

### 642 **Acridine orange assay**

643 Acridine orange (AO; Sigma A6014; 100 X) staining was performed on WT and *trm* mutants to analyze cell  
644 death (Kroeger et al., 2017; Westerfield, 193). In brief, a 50 X AO stock solution (250 µg/ml) was made. At  
645 24 hpf, embryos were incubated in 1:50 AO solution (made from 50 X stock) diluted in 0.003% PTU/E3  
646 media protected from light for 1 hour. Embryos were then washed three times with 0.003% PTU/E3, and  
647 then imaged with a dissecting microscope under the GFP filter in 2% methylcellulose/0.02% tricaine.  
648

### 649 **Dextran clearance assay**

650 To assess kidney function in WT and *trm* mutants, clearance assays using fluorescent 40 kDa dextran-  
651 fluorescein (FITC) (Invitrogen) were completed. Embryos were treated with 0.003% PTU at 24 hpf. At 2  
652 dpf, embryos were anesthetized with 0.02% tricaine and dextran-FITC was injected into circulation. Live

653 fluorescent imaging was performed 1 hour after injection and 24 hours after injection. Embryos were live-  
654 imaged with a dissecting microscope under the GFP filter in methylcellulose/0.02% tricaine.  
655

656 **Acknowledgements**

657 We thank Bruce Riley for sharing the inducible *hs:tfap2a* zebrafish transgenic with us. We thank the staffs  
658 of the Department of Biological Sciences and the Center for Zebrafish Research at the University of Notre  
659 Dame for their dedication and care of our zebrafish aquarium. Finally, we thank the members of our lab for  
660 their support, discussions, and insights about this work.

661

662

663

664 **Competing Interests**

665 The authors declare no competing interests.

666

667

668

669 **Funding**

670 This work was supported by the National Institutes of Health [R01DK100237 to R.A.W.]. We are grateful to  
671 Elizabeth and Michael Gallagher for a generous gift to the University of Notre Dame on behalf of their  
672 family for the support of stem cell research. The funders had no role in the study design, data collection  
673 and analysis, decision to publish, or manuscript preparation.

674

675

676

677 **Author Contributions**

678 BEC, GFG, KHC, EGC, IL and RAW performed experiments. BEC, GFG, KHC, EGC, WG and RAW  
679 analyzed the results. BEC and RAW wrote and revised the paper.

680

681

682

683 **Data Availability**

684 All data related to the present study is provided within the figures and supplementary information.

685 **References**

686

687 **Alarcón, P., Rodríguez-Seguel, E., Fernández-González, A., Rubio, R., and Gómez-Skarmeta, J.L.**  
688 (2008). A dual requirement for Iroquois genes during *Xenopus* kidney development. *Development* **135**,  
689 3197-3207.

690

691 **Airik, R., and Kispert, A.** (2007). Down the tube of obstructive nephropathies: the importance of tissue  
692 interactions during ureter development. *Kidney Int.* **72**, 1459-1467.

693

694 **Barrallo-Gimeno, A., Holzschuh, J., Driever, W., and Knapik, E.W.** (2003). Neural crest survival and  
695 differentiation in zebrafish depends on mont blanc/tfap2a gene function. *Development* **131**, 1463-1477.

696

697 **Bassett, E.A., Korol, A., Deschamps, P.A., Buettner, R., Wallace, V.A., Williams, T., and West-Mays**  
698 **J.A.** (2012). Overlapping expression patterns and redundant roles for AP-2 transcription factors in the  
699 developing mammalian retina. *Dev. Dyn.* **241**, 814-829.

700

701 **Basta, J. M., Robbins L., Denner D. R., Kolar, G. R., and Rauchman, M. A.** (2017). Sall1-NuRD  
702 interaction regulates multipotent nephron progenitors and is required for loop of Henle formation.  
703 *Development* **144**, 3080-3094.

704

705 **Bhat, N., Kwon, H.J., and Riley, B.B.** (2012). A gene network that coordinates preplacodal competence  
706 and neural crest specification in zebrafish. *Dev. Biol.* **373**, 107-117.

707

708 **Brend, T., and Holley, S.A.** (2009). Zebrafish whole mount high-resolution double fluorescent in situ  
709 hybridization. *J. Vis. Exp.* **25**, pii1229.

710

711 **Brewer, S., and Williams, T.** (2004a) Loss of AP-2alpha impacts multiple aspects of ventral body wall  
712 development and closure. *Dev. Biol.* **267**, 399-417.

713

714 **Brewer, S., Feng, W., Huang, J., Sullivan, S., and Williams, T.** (2004b) Wnt1-Cre-mediated deletion of  
715 AP-2alpha causes multiple neural crest-related defects. *Dev. Biol.* **267**, 135-52.

716

717 **Chambers, J., McKee, R.A., Drummond, B.E., and Wingert R.A.** (2016). Evolving technology: creating  
718 kidney organoids from stem cells. *AIMS Bioeng.* **3**, 305-318.

719

720 **Cheng, C.W., Hui, C., Strähle, U., and Cheng, S.H.** (2001). Identification and expression of zebrafish  
721 Iroquois homeobox gene *irx1*. *Dev. Genes. Evol.* **211**, 442-444.

722

723 **Cheng, C.N., Li, Y., Marra, A.N., Verdun, V., and Wingert, R.A.** (2014). Flat mount preparation for  
724 observation and analysis of zebrafish embryo specimens stained by whole mount in situ hybridization. *J.*  
725 *Vis. Exp.* **89**, e51604.

726

727 **Cheng, C.N., and Wingert, R.A.** (2015). Nephron proximal tubule patterning and corpuscles of Stannius  
728 formation are regulated by the *sim1a* transcription factor and retinoic acid in zebrafish. *Dev. Biol.* **399**, 100-  
729 116.

730

731 **Chung, E., Deacon, P., and Park, J.S.** (2017). Notch is required for the formation of all nephron segments  
732 and primes nephron progenitors for differentiation. *Development* **144**, 4530-4539.

733

734 **de Crozé, N., Maczkowiak, F., and Monsoro-Burq, A.H.** (2011). Reiterative AP2a activity controls  
735 sequential steps in the neural crest gene regulatory network. *Proc. Natl. Acad. Sci. USA* **108**, 155-60.

736

737 **Desgrange, A., and Cereghini, S.** (2015). Nephron patterning: lessons from *Xenopus*, zebrafish and  
738 mouse studies. *Cells* **4**, 483-499.

- 739  
740 **Drake, K.A., Adam, M., Mahoney, R., and Potter, S.S.** (2018). Disruption of Hox9,10,11 function results  
741 in cellular level lineage infidelity in the kidney. *Sci. Rep.* **8**, 6306.  
742  
743 **Dressler, G. R.** (2006). The cellular basis of kidney development. *Annu. Rev. Cell Dev. Biol.* **22**, 509-529.  
744  
745 **Drummond, B.E., Li, Y., Marra, A.N., Cheng, C.N., and Wingert, R.A.** (2016). The tbx2a/b transcription  
746 factors direct pronephros segmentation and corpuscle of Stannius formation in zebrafish. *Dev. Biol.* **421**,  
747 52-66.  
748  
749 **Eckert, D., Buhl, S., Weber, S., Jäger, R., and Schorle, H.** (2005). The AP-2 family of transcription  
750 factors. *Genome Biol.* **6**, 246.  
751  
752 **Galloway, J.L., Wingert, R.A., Thisse, C., Thisse, B., and Zon, L.I.** (2008). Combinatorial regulation of  
753 novel erythroid gene expression in zebrafish. *Exp. Hematol.* **36**, 424–432.  
754  
755 **Gerlach, G.F., and Wingert, R.A.** (2013) Kidney organogenesis in the zebrafish: insights into vertebrate  
756 nephrogenesis and regeneration. *Wiley Interdiscip. Rev. Dev. Biol.* **2**, 559-585.  
757  
758 **Gerlach, G.F., and Wingert, R.A.** (2014). Zebrafish pronephros tubulogenesis and epithelial identity  
759 maintenance are reliant on the polarity proteins Prkc iota and zeta. *Dev. Biol.* **396**,183-200.  
760  
761 **Greco, D., Zellmer, E., Zhang, Z., and Lewis, E.** (1995). Transcription factor AP-2 regulates expression  
762 of the dopamine beta-hydroxylase gene. *J. Neurochem.* **65**, 510-516.  
763  
764 **Green, R.M., Feng, W., Phang, T., Fish, J.L., Li, H., Spritz, R.A., Marcucio, R.S., Hooper, J.,**  
765 **Jamniczky, H., Hallgrímsson, B., et al.** (2014). Tfp2a-dependent changes in mouse facial morphology  
766 result in clefting that can be ameliorated by a reduction in Fgf8 gene dosage. *Dis. Model Mech.* **8**, 31-43.  
767  
768 **Handwerger, S.** (2009). New insights into the regulation of human cytotrophoblast cell differentiation. *Mol.*  
769 *Cell Endocrinol.* **323**, 94-104.  
770  
771 **Hariharan, K., Kurtz, A., and Schmidt-Ott, K.M.** (2015). Assembling kidney tissues from cells: the long  
772 road from organoids to organs. *Front. Cell Dev. Biol.* **3**, 70.  
773  
774 **Hilger-Eversheim, K., Moser, M., Schorle, H., and Buettner, R.** (2000). Regulatory roles of AP-2  
775 transcription factors in vertebrate development, apoptosis and cell-cycle control. *Gene* **260**,1-12.  
776  
777 **Hoffman, T.L., Javier, A.L., Campeau, S.A., Knight, R.D., and Schilling, T.F.** (2007). Tfp2 transcription  
778 factors in zebrafish neural crest development and ectodermal evolution. *J. Exp. Zool. B Mol. Dev. Evol.*  
779 **308**, 679-691.  
780  
781 **Holzschuh, J., Barrallo-Gimeno, A., Ettl, A.K., Durr, K., Knapik, E.W., Driever, W.** (2003).  
782 Noradrenergic neurons in the zebrafish hindbrain are induced by retinoic acid and require tfap2a for  
783 expression of the neurotransmitter phenotype. *Development* **130**, 5741-5754.  
784  
785 **Jin, K., Jiang, H., Xiao, D., Zou, M., Zhu, J., and Xiang, M.** (2015). Tfp2a and 2b act downstream of  
786 Ptf1a to promote amacrine cell differentiation during retinogenesis. *Mol. Brain.* **8**, 28.  
787  
788 **Kantarci, H., Edlund, R.K., Groves, A.K., and Riley B.B.** (2015). Tfp2a promotes specification and  
789 maturation of neurons in the inner ear through modulation of Bmp, Fgf and notch signaling. *PLoS Genet.*  
790 **11**, e1005037.  
791  
792 **Kerber, B., Monge, I., Mueller, M., Mitchell, P.J., and Cohen, S.M.** (2001). The AP-2 transcription factor  
793 is required for joint formation and cell survival in Drosophila leg development. *Development* **128**, 1231-8.



794

795 **Kim, H.S., Hong, S.J., LeDoux, M.S., and Kim, K.S.** (2001). Regulation of the tyrosine hydroxylase and  
796 dopamine beta-hydroxylase genes by the transcription factor AP-2. *J. Neurochem.* **76**, 280-294.

797

798 **Kimmel, C.B., Ballard, W.W., Kimmel, S.R., Ullmann, B., and Schilling, T.F.** (1995). Stages of  
799 embryonic development of the zebrafish. *Dev. Dyn.* **203**, 253-310.

800

801 **Knight, R.D., Nair, S., Nelson, S.S., Afshar, A., Javidan, Y., Geisler, R., Rauch, G.J., and Schilling,**  
802 **T.F.** (2003). lockjaw encodes a zebrafish tfap2a required for early neural crest development. *Development*  
803 **130**, 5755-68.

804

805 **Knight, R.D., Javidan, Y., Zhang, T., Nelson, S., and Schilling, T.F.** (2005). AP2-dependent signals  
806 from the ectoderm regulate craniofacial development in the zebrafish embryo. *Development* **132**, 3127-  
807 3138.

808

809 **Kroeger, P.T. Jr., Poureetezadi, S.J., McKee, R., Jou, J., Miceli, R., and Wingert, R.A.** (2014).  
810 Production of haploid zebrafish embryos by in vitro fertilization. *J. Vis. Exp.* **89**, e51708.

811

812 **Kroeger, P.T. Jr., Drummond, B.E., Miceli, R., McKernan, M., Gerlach, G.F., Marra, A.N., Fox, A.,**  
813 **McCampbell, K.K., Leshchiner, I., Rodriguez-Mari, A., BreMiller, R., et al.** (2017). The zebrafish kidney  
814 mutant zeppelin reveals that brca2/fancd1 is essential for pronephros development. *Dev. Biol.* **428**,148-  
815 163.

816

817 **Kwon, H.J., Bhat, N., Sweet, E.M., Cornell, R.A., and Riley, B.B.** (2010). Identification of early  
818 requirements for preplacodal ectoderm and sensory organ development. *PLoS Genet.* **6**, e1001133.

819

820 **Lengerke, C., Wingert, R., Beeretz, M., Grauer, M., Schmidt, A.G., Konantz, M., Daley, G.Q., and**  
821 **Davidson, A.J.** (2011). Interactions between Cdx genes and retinoic acid modulate early cardiogenesis.  
822 *Dev. Biol.* **163**,134–142.

823

824 **Leshchiner, I., Alexa, K., Kelsey, P., Adzhubei, I., Austin-Tse, C.A., Cooney, J.D., Anderson, H.,**  
825 **King, M.J., Stottmann, R.W., Garnaas, M.K., et al.** (2012). Mutation mapping and identification by whole-  
826 genome sequencing. *Genome Res.* **22**, 1541-1548.

827

828 **Li, Y., Cheng, C.N., Verdun, V.A., and Wingert, R.A.** (2014). Zebrafish nephrogenesis is regulated by  
829 interactions between retinoic acid, mecom, and Notch signaling. *Dev. Biol.* **386**, 111-122.

830

831 **Li, W., and Cornell, R.A.** (2007). Redundant activities of Tfap2a and Tfap2c are required for neural crest  
832 induction and development of other non-neural ectoderm derivatives in zebrafish embryos. *Dev. Biol.* **304**,  
833 338-54.

834

835 **Lindström, N.O., Lawrence, M.L., Burn, S.F., Johansson, J.A., Bakker, E.R.M., Ridgway, R.A.,**  
836 **Chang, C.H., Karolak, M.J., Oxburgh, L., Headon, D.J., et al.** (2015). Integrated B-Catenin, BMP, PTEN,  
837 and Notch signalling patterns the nephron. *Elife* **3**, e04000.

838

839 **Lindström, N.O., McMahon, J.A., Guo, J., Tran, T., Guo, Q., Rutledge, E., Parvez, R.K., Saribekyan,**  
840 **G., Schuler, R.E., Liao, C., et al.** (2018a). Conserved and divergent features of human and mouse kidney  
841 organogenesis. *J. Am. Soc. Nephrol.* **29**, 785-805.

842

843 **Lindström, N.O., De Sena Brandine, G., Tran, T., Ransick, A., Suh, G., Guo, J., Kim, A.D., Parvez,**  
844 **R.K., Ruffins, S.W., Rutledge, E.A., et al.** (2018b). Progressive recruitment of mesenchymal progenitors  
845 reveals a time-dependent process of cell fate acquisition in mouse and human nephrogenesis. *Dev. Cell.*  
846 **45**, 651-660.

- 847 **Magella, B., Mahoney, R., Adam, M., and Potter, S.S.** (2018). Reduced Abd-B Hox function during  
848 kidney development results in lineage infidelity. *Dev. Biol.* **438**, 84-93.
- 849
- 850 **Marra, A.N., and Wingert, R.A.** (2014). Roles of Iroquois transcription factors in kidney development. *Cell*  
851 *Dev. Biol.* **3**, 1000131.
- 852
- 853 **Marra, A.N., and Wingert, R.A.** (2016). Epithelial cell fate in the nephron tubule is mediated by the ETS  
854 transcription factors *etv5a* and *etv4* during zebrafish kidney development. *Dev. Biol.* **411**, 231-245.
- 855
- 856 **Marra, A.N., Li, Y., and Wingert, R.A.** (2016). Antennas of organ morphogenesis: the roles of cilia in  
857 vertebrate kidney development. *Genesis* **54**, 457-469.
- 858
- 859 **Marra, A.N., Ulrich, M., White, A., Springer, M., and Wingert, R.A.** (2017). Visualizing multiciliated cells  
860 in the zebrafish through a combined protocol of whole mount fluorescent in situ hybridization and  
861 immunofluorescence. *J. Vis. Exp.* **129**, e56261.
- 862
- 863 **McCampbell, K.K., Springer, K.N., and Wingert, R.A.** (2015). Atlas of cellular dynamics during zebrafish  
864 adult kidney regeneration. *Stem Cells Int.* **2015**, 547636.
- 865
- 866 **McKee, R., Gerlach, G.F., Jou, J., Cheng, C.N., and Wingert, R.A.** (2014). Temporal and spatial  
867 expression of tight junction genes during zebrafish pronephros development. *Gene Expr. Patterns* **16**, 104-  
868 113.
- 869
- 870 **Milunsky, J.M., Maher, T.A., Zhao, G., Roberts, A.E., Stalker, H.J., Zori, R.T., Burch, M.N., Clemens,  
871 M., Mulliken, J.B., Smith, R., et al.** (2008). TFAP2A mutations result in branchio-oculo-facial syndrome.  
872 *Am. J. Hum. Genet.* **82**,1171-1177.
- 873
- 874 **Morales, E.M., Handa, N., Drummond, B.E., Chambers, J.M., Marra, A.N., Addiego, A., and Wingert,  
875 R.A.** (2018). Homeogene *emx1* is required for nephron distal segment development in zebrafish. *Sci.*  
876 *Reports* in press.
- 877
- 878 **Moser, M., Rüschoff, J., and Buettner, R.** (1997a). Comparative analysis of AP-2 alpha and AP-2 beta  
879 gene expression during murine embryogenesis. *Dev. Dyn.* **208**, 115-24.
- 880
- 881 **Moser, M., Pscherer, A., Roth, C., Becker, J., Mücher, G., Zerres, K., Dixkens, C., Weis, J., Guay-  
882 Woodford, L., Buettner R., et al.** (1997b). Enhanced apoptotic cell death of renal epithelial cells in mice  
883 lacking transcription factor AP-2beta. *Genes Dev.***11**, 1938-48.
- 884
- 885 **Naylor, R.W., Przepiorski, A., Ren, Q., Yu, J., and Davidson, A.J.** (2013). HNF1β is essential for  
886 nephron segmentation during nephrogenesis. *J. Am. Soc. Nephrol.* **24**, 77-87.
- 887
- 888 **Naylor, R.W., Qubisi, S.S., and Davidson, A.J.** (2017). Zebrafish pronephros development. *Results*  
889 *Probl. Cell Differ.* **60**, 27-53.
- 890
- 891 **Neirijnck, Y., Reginensi, A., Renkema, K.Y., Massa, F., Kozlov, V.M., Dhib, H., Bongers, E.M.H.F.,  
892 Feitz, W.F., van Eerde, A.M., Lefebvre, V., et al.** (2018). Sox11 gene disruption causes congenital  
893 anomalies of the kidney and urinary tract (CAKUT). *Kidney Int.* **93**, 1142-1153.
- 894
- 895 **Neuhauss, S.C., Solnica-Krezel, L., Schier, A.F., Zwartkruis, F., Stemple, D.L., Malicki, J., Abdelilah,  
896 S., Stainier, D.Y., and Driever W.** (1996). Mutations affecting craniofacial development in zebrafish.  
897 *Development* **123**, 357-67.
- 898
- 899 **O'Brien, E.K., d'Alençon, C., Bonde, G., Li, W., Schoenebeck, J., Allende, M.L., Gelb, B.D., Yelon, D.,  
900 Eisen, J.S., and Cornell, R.A.** (2004). Transcription factor Ap-2alpha is necessary for development of

- 901 embryonic melanophores, autonomic neurons and pharyngeal skeleton in zebrafish. *Dev. Biol.* **265**, 246-  
902 261.
- 903
- 904 **Oxburgh, L., Carroll, T.J., Cleaver, O., Gossett, D.R., Hoshizaki, D.K., Hubbell, J.A., Humphreys,**  
905 **B.D., Jain, S., Jensen, J., Kaplan, D.L., et al.** (2017). (Re)Building a Kidney. *J. Am. Soc. Nephrol.* **28**,  
906 1370-1378.
- 907
- 908 **Pfisterer, P., Ehlermann, J., Hegen, M., and Schorle, H.** (2001). A subtractive gene expression screen  
909 suggests a role of transcription factor AP-2 alpha in control of proliferation and differentiation. *J. Biol.*  
910 *Chem.* **277**, 6637-44.
- 911
- 912 **Pihlajamaa, P., Sahu, B., Lyly, L., Aittomäki, V., Hautaniemi, S., and Jänne, O.A.** (2014). Tissue-  
913 specific pioneer factors associate with androgen receptor cistromes and transcription programs. *EMBO J.*  
914 **33**, 312-26.
- 915
- 916 **Poureetezadi, S.J., Cheng, C.N., Chambers, J.M., Drummond, B.E., and Wingert, R.A.** (2016).  
917 Prostaglandin signaling regulates nephron segment patterning of renal progenitors during zebrafish kidney  
918 development. *Elife* **5**, pii:e17551.
- 919
- 920 **Poureetezadi, S.J., and Wingert, R.A.** (2016) Little fish, big catch: zebrafish as a model for kidney  
921 disease. *Kidney Int.* **89**, 1204-1210.
- 922
- 923 **Reggiani, L., Raciti, D., Airik, R., Kispert, A., and Brändli, A.W.** (2007). The prepattern transcription  
924 factor *lrx3* directs nephron segment identity. *Genes Dev.* **21**, 2358-2370.
- 925
- 926 **Ryan, S., Willer, J., Marjoram, L., Bagwell, J., Mankiewicz, J., Leshchiner, I., Goessling, W., Bagnat,**  
927 **M., and Katsanis, N.** (2013). Rapid identification of kidney cyst mutations by whole exome sequencing in  
928 zebrafish. *Development* **140**, 4445-4451.
- 929
- 930 **Satoda, M., Zhao, F., Diaz, G.A., Burn, J., Goodship, J., Davidson, H.R., Pierpont, M.E., and Gelb**  
931 **B.D.** (2000). Mutations in *TFAP2B* cause Char syndrome, a familial form of patent ductus arteriosus. *Nat.*  
932 *Genet.* **25**, 42-6.
- 933
- 934 **Saxen, L.** (1987). *Organogenesis of the kidney*. Cambridge, UK: Cambridge University Press.
- 935
- 936 **Schedl, A.** (2007). Renal abnormalities and their developmental origin. *Nat. Rev. Genet.* **8**, 791-802.
- 937
- 938 **Schmidt, M., Huber, L., Majdazari, A., Schütz, G., Williams, T., and Rohrer H.** (2011). The transcription  
939 factors AP-2 $\beta$  and AP-2 $\alpha$  are required for survival of sympathetic progenitors and differentiated  
940 sympathetic neurons. *Dev. Biol.* **355**, 89-100.
- 941
- 942 **Schorle, H., Meier, P., Buchert, M., Jaenisch, R., and Mitchell, P.J.** (1996). Transcription factor AP-2  
943 essential for cranial closure and craniofacial development. *Nature* **381**, 235-8.
- 944
- 945 **Seberg, H.E., Van Otterloo, E., Loftus, S.K., Liu, H., Bonde, G., Sompallae, R., Gildea, D.E., Santana,**  
946 **J.F., Manak, J.R., Pavan, W.J., et al.** (2017). *TFAP2* paralogs regulate melanocyte differentiation in  
947 parallel with *MITF*. *PLoS Genet.* **13**, e1006636.
- 948
- 949 **Song, R., and Yosypiv, I.V.** (2011). Genetics of congenital anomalies of the kidney and urinary tract.  
950 *Pediatr. Nephrol.* **26**, 353-364.
- 951
- 952 **Sugano, Y., Cianciolo Cosentino, C., Loffing-Cueni, D., Neuhauss, S.C.F., and Loffing, J.** (2017).  
953 Comparative transcriptomic analysis identifies evolutionarily conserved gene products in the vertebrate  
954 renal distal convoluted tubule. *Pflugers Arch.* **469**, 859-867.
- 955

- 956 **Takasato, M., and Little, M.H.** (2017). Making a kidney organoid using the directed differentiation of  
957 human pluripotent stem cells. *Methods Mol. Biol.* **1597**, 195-206.  
958
- 959 **Van Otterloo, E., Li, W., Bonde, G., Day, K.M., Hsu, M.Y., and Cornell, R.A.** (2010). Differentiation of  
960 zebrafish melanophores depends on transcription factors AP2 alpha and AP2 epsilon. *PLoS Genet.* **6**,  
961 e1001122.  
962
- 963 **Van Otterloo, E., Li, H., Jones, K.L., and Williams, T.** (2018). AP-2 $\alpha$  and AP-2 $\beta$  cooperatively  
964 orchestrate homeobox gene expression during branchial arch patterning. *Development* **145**, pii:  
965 dev157438.  
966
- 967 **Wang, I.J., Tsai, R.J., Yeh, L.K., Tsai, R.Y., Hu, F.R., and Kao, W.W.** (2011). Changes in corneal basal  
968 epithelial phenotypes in an altered basement membrane. *PLoS One* **6**, e14537.  
969
- 970 **Wang J, Ji W, Zhu D, Wang W, Chen Y, Zhang Z, and Li F.** (2018). Tfp2b mutation in mice results in  
971 patent ductus arteriosus and renal malformation. *J. Surg. Res.* **227**, 178-185.  
972
- 973 **Westerfield, M.** (1993). *The Zebrafish Book*. Eugene, USA: University of Oregon Press.  
974
- 975 **Wingert, R.A., Brownlie, A., Galloway, J.L., Dooley, K., Fraenkel, P., Axe, J.L., Davidson, A.J., Barut,**  
976 **B., Noriega, L., Sheng, X., et al.** (2004). The chianti zebrafish mutant provides a model for erythroid-  
977 specific disruption of transferrin receptor 1. *Development* **131**, 6225-6235.  
978
- 979 **Wingert, R.A., Selleck, R., Yu, J., Song, H.D., Chen, Z., Song, A., Zhou, Y., Thisse, B., Thisse, C.,**  
980 **McMahon, A.P., et al.** (2007). The cdx genes and retinoic acid control the positioning and segmentation of  
981 the zebrafish pronephros. *PLoS Genet.* **3**, 1922-1938.  
982
- 983 **Wingert, R.A., and Davidson, A.J.** (2008). The zebrafish pronephros: a model to study nephron  
984 segmentation. *Kidney Int.* **73**, 1120-1127.  
985
- 986 **Wingert, R.A., and Davidson A.J.** (2011). Zebrafish nephrogenesis involves dynamic spatiotemporal  
987 expression changes in renal progenitors and essential signals from retinoic acid and irx3b. *Dev. Dyn.* **240**,  
988 2011-2027.  
989
- 990 **Zhang, J., Hagopian-Donaldson, S., Serbedzija, G., Elsemore, J., Plehn-Dujowich, D., McMahon,**  
991 **A.P., Flavell, R.A., and Williams, T.** (1996). Neural tube, skeletal and body wall defects in mice lacking  
992 transcription factor AP-2. *Nature* **381**, 238-241.  
993
- 994 **Zhang, J., Yuan, S., Vasilyev, A., and Amin Arnaut, M.** (2015). The transcriptional coactivator Taz  
995 regulates proximodistal patterning of the pronephric tubule in zebrafish. *Mech. Dev.* **3**, 328-335.

996 **Figure Legends**

997

998 **Figure 1: Forward genetic screen reveals *tfap2a* is necessary for nephrogenesis in the developing**

999 **zebrafish pronephros. A.** Schematic depicts lateral and dorsal views of fully segmented pronephros in 24  
1000 hpf zebrafish embryo (P: podocytes, N: neck, PCT: proximal convoluted tubule, DE: distal early segment,  
1001 CS: corpuscle of Stannius, DL: distal late segment, CD: collecting duct). **B.** Screening approach by WISH  
1002 of alternating nephron compartment markers *wt1b/slc20a1a/slc12a1* (P/PCT/DE) in WT and *trm* at 24 hpf.  
1003 Scale bar = 70µm. **C.** SNPtrack results from whole genome sequencing concentration of SNPs at  
1004 chromosome 24. Confirmation of G → A *tfap2a* mutation by direct PCR sequencing of *trm*<sup>-/-</sup> embryos. Exon  
1005 diagram of *tfap2a* depicts 3 alternative spliceoforms (pink, cyan, orange lines). Black \*'s indicate  
1006 alternative start sites. *tfap2a* MO-splice (blue) targets 3' end of exon 2. *tfap2a*<sup>m819</sup> lesion (red x) generates  
1007 stop codon in exon 5. *trm* G > A mutation (red) maps to 3' end of exon 1c. Green letters indicate conserved  
1008 splice residues. RT-PCR primers used for RT-PCR analysis flank intron 1-2 (purple arrows). **D.** RT-PCR  
1009 analysis of control (WT) embryos, WT *trm* siblings, and *trm*<sup>-/-</sup>. Mutant bands are labeled 1-4 in green. Table  
1010 indicates predicted genetic consequence from sequencing the mutant bands. (TAD:transcriptional  
1011 activation domain, DBD:DNA binding domain). **E.** Failure to complement revealed by WISH analysis of  
1012 *dlx2a* (pharyngeal arches outlined in white) and *romk2* (DE) in WT and *trm*<sup>+/-</sup> x *tfap2a*<sup>m819+/-</sup> compound  
1013 mutants. Scale bars = 70 µm, 35 µm. **F.** Live imaging at 4 dpf reveals abnormal craniofacial cartilage  
1014 (black arrowhead) and pericardial edema (blue arrowhead) in *trm*<sup>-/-</sup> and *tfap2a* morphants. Scale bar = 200  
1015 µm. **G.** Alcian Blue cartilage staining in WT and *trm*<sup>-/-</sup> at 4 dpf. Gaping jaw phenotype indicated by black  
1016 arrowhead. Black dotted lines are utilized to trace Meckel's cartilage. Scale bar = 100 µm. **H.** Whole mount  
1017 IF of Tfap2a protein in WT and *trm*<sup>-/-</sup> at 24 hpf. White dotted lines delineate pronephric tubule. Cyan box  
1018 denotes 40x optical zoom. Scale bar = 30 µm.

1019

1020

1021 **Figure 2: *tfap2a* and *tfap2b* transcripts are expressed in dynamic overlapping domains in**

1022 **developing nephrons, where *tfap2a* acts upstream of *tfap2b*.** **A.** WISH of WT *tfap2a* and *tfap2b*  
1023 expression (purple) at the 10, 15, 20, 24, and 28 ss. *smyh1* (red) was used to mark somites. Black boxes  
1024 indicate *tfap2* expression domains within developing renal progenitors. Scale bar = 200 µm. **B.** Double  
1025 FISH of WT *tfap2a* (green) and *tfap2b* (red) transcript expression at 10 ss (flat mount), 20 ss, and 28 ss  
1026 (lateral views). DAPI (blue) labels nuclei. White arrowheads demarcate cellular regions of overlapping  
1027 transcripts within the pronephros. Scale bar = 70 µm. **C.** Double FISH of *slc12a1* (pink) and *tfap2a* (green)  
1028 in WT embryo at 24 hpf. White box indicates area featured in bottom panel (60x z-stack). White dotted line  
1029 outlines nephron tubule. DAPI (blue) labels nuclei. Scale bars = 70 µm, 10 µm. **D.** WISH analysis of *tfap2b*  
1030 expression in WT and *trm*<sup>-/-</sup>. Arrowhead indicates differential hindbrain expression of *tfap2b*. Black box  
1031 designates *tfap2b* expression within pronephros. Scale bars = 100 µm, 50 µm. **E.** WISH analysis of *tfap2a*  
1032 expression in WT and *tfap2b* MO. Black box designates *tfap2a* expression within pronephros. Scale bars =



1033 100  $\mu\text{m}$ , 50  $\mu\text{m}$ . **F.** Quantification of absolute length measurements of *tfap2b* expression domain within  
1034 pronephros. **G.** Quantification of absolute length measurements of *tfap2a* expression domain within  
1035 pronephros.  $n = 3$  for each control and test group. Absolute measurements (in microns) were analyzed by  
1036 unpaired t-tests. Data are represented as  $\pm$  SD. \*\*\* $p < 0.001$ , N.S. = not significant.

1037

1038

1039 **Figure 3: *tfap2a* and *tfap2b* function redundantly to activate distal nephron solute transporter**  
1040 **signature. A.** WT and *trm*<sup>-/-</sup> embryos were microinjected with combinations of *tfap2a* and *tfap2b* splice-  
1041 MOs. WISH was used to stain embryos for *slc12a1* (DE, purple), *slc12a3* (DL, red), and *clcnk* (Pandistal,  
1042 purple) at 24 hpf. Black bars indicate WT marker domains. Scale bar = 35  $\mu\text{m}$ . **B.** Quantification of  
1043 absolute length of *slc12a1* expression domain. **C.** Quantification of absolute length measurements of  
1044 *slc12a3* expression domain. **D.** Quantification of absolute length measurements of *clcnk* expression  
1045 domain.  $n \geq 4$  for each control and test group. Measurements were compared by ANOVA. Data are  
1046 represented as  $\pm$  SD. \* $p < 0.05$ , \*\* $p < 0.01$ , Green brackets indicate not statistically significant.

1047

1048

1049 **Figure 4: *tfap2a* is necessary and sufficient to drive the DE gene expression program. A.** *trm*<sup>-/-</sup>  
1050 */hs:tfap2a* and *hs:tfap2a* were heat-shocked at the 8 ss to overexpress WT Tfp2a protein for rescue and  
1051 gain of function studies. WT embryos were microinjected with *tfap2a* cRNA for an independent gain of  
1052 function studies. Control and experimental samples subjected to WISH analysis for *romk2* (DE) expression  
1053 at 24 hpf. Black bar indicates WT *romk2* domain. Scale bars = 70  $\mu\text{m}$ . **B.** Quantification of absolute length  
1054 measurements of *romk2* expression domain.  $n \geq 4$  for each control and test group. Measurements were  
1055 compared by ANOVA. Data are represented as  $\pm$  SD. \*\* $p < 0.01$ , Green brackets indicate not statistically  
1056 significant. HS+ (red) signifies application of heat-shock. HS- (black) indicates no heat-shock. +*tfap2a*  
1057 cRNA (blue) represents microinjection of *tfap2a* capped RNA at the 1-cell stage. **C.** Double FISH analysis  
1058 of *slc12a1* (DE, green) and *slc12a3* (DL, red) in WT and heat shock-treated *hs:tfap2a* embryos at 24 hpf.  
1059 Scale bar = 20  $\mu\text{m}$ . White box indicates area imaged at higher (60X) objective in C'. **C'.** DAPI only (above)  
1060 and merged channels (below). Dotted white line outlines a single cell coexpressing *slc12a1* and *slc12a3*  
1061 transcripts. **D.** Double FISH analysis of *slc9a3* (panproximal, red) and *slc12a1* (DE, green) in WT and heat  
1062 shock-treated *hs:tfap2a* embryos at 24 hpf. Scale bar = 35  $\mu\text{m}$ . White box indicates area imaged at higher  
1063 (60X) objective in D'. **D'.** DAPI (above) and merged channels (below). Dotted white line outlines a single  
1064 cell coexpressing *slc9a3* and *slc12a1* transcripts. DAPI (blue) labels nuclei.

1065

1066

1067 **Figure 5: *tfap2a* is essential for the induction of terminal differentiation, but not cell proliferation,**  
1068 **survival, polarity or ciliogenesis within the distal nephron. A.** WISH used to stain *dlx2* (pharyngeal  
1069 arches, purple), *slc9a3* (panproximal, purple), and *slc12a3* (DL, red) performed on 24 hpf WT and *trm*<sup>-/-</sup>



1070 embryos to assess nephron patterning. Black dotted lines indicate presumptive area occupied by DE  
1071 progenitors. Scale bars = 70 $\mu$ m. **B.** WISH analysis of *dlx2* and renal specification markers that span entire  
1072 tubule (*cdh17* and *hnf1ba*) in WT and *trm*<sup>-/-</sup> at 24 hpf. Green boxes indicate continuous expression of tubule  
1073 markers in DE. Scale bar = 70  $\mu$ m. **C.** Whole mount FISH and IF to visualize proliferating DE cells  
1074 (*slc12a1*, green) in WT and *trm*<sup>-/-</sup> at 24 hpf. anti-ph3 (red) labels proliferation. White dotted lines outline  
1075 pronephric tubule (bottom). Scale bar = 10  $\mu$ m. **D.** Acridine orange assay reveals no detectable difference  
1076 in dying cell number (green) in WT and *trm*<sup>-/-</sup> at 24 hpf. White box indicates inset (optical zoom) of distal  
1077 nephron area. Scale bar = 70  $\mu$ m. **E.** Survey of epithelial polarity proteins by whole mount IF in WT and  
1078 *trm*<sup>-/-</sup> at 4 dpf. anti-Na,K-ATPase (red) was used as a basolateral marker and anti-aPKC (green) was used  
1079 as an apical marker. Top image represents WT Na,K-ATPase protein expression in 4 dpf. White boxes  
1080 indicate region in E'. Scale bars = 200  $\mu$ m, 10  $\mu$ m. **E'.** Regions highlighted in B showing normal protein  
1081 localization. **F.** Whole mount FISH with IF to assess cilia (anti-acetylated tubulin, green) morphology in the  
1082 DE (*slc12a1*, red) of WT and *trm*<sup>-/-</sup> at 24 hpf. White dotted lines demarcate nephron. Scale bar = 10  $\mu$ m.  
1083 DAPI (blue) labels nuclei.

1084

1085

1086 **Figure 6: *tfap2a* interplays with the Iroquois homeobox genes *irx3b* and *irx1a* during**  
1087 **nephrogenesis. A.** Whole mount double FISH in 20 ss WT animals reveal *tfap2a* transcripts (green) and  
1088 *irx3b* transcripts (red) are coexpressed distal pronephros. White box focuses on area of intense  
1089 coexpression. Bottom panel indicates area outlined by white box at 60X magnification. DAPI (blue) labels  
1090 nuclei. Scale bars = 70  $\mu$ m, 10  $\mu$ m. **B.** Top panel: WISH for *irx3b* (purple) and *smyh1* (red) in WT and  
1091 *tfap2a* morphants at 24 hpf. White dotted line indicates *irx3b* expression domain, which does not change  
1092 due to *tfap2a*-deficiency. Bottom panel: WISH for *tfap2a* expression in *irx3b* morphants at 24 hpf. Black  
1093 box indicates presence of *tfap2a* transcripts in DE segment domain in WT. Red box indicates absence of  
1094 *tfap2a* transcripts in DE segment domain in *irx3b* morphants. Red asterisks (\*) indicate loss of *tfap2a*  
1095 expression within the neural crest streams in *irx3b* morphants. Scale bar = 70 $\mu$ m. **C.** Quantification of  
1096 *tfap2a* expression domain length. Measurements were compared by unpaired t-test. Data are represented  
1097 as  $\pm$  SD. \*\*\*p<0.001. **D.** WISH reveals reduced *irx1a* expression in *trm*<sup>-/-</sup> and *tfap2a* morphants as  
1098 compared to WT at 24 hpf. Scale bar = 35  $\mu$ m. **E.** WISH of *irx1a* expression in *hs:tfap2a* untreated and  
1099 heat shock-treated (red HS+) at 24 hpf. Black dotted lines denotes increased expression of *irx1a* in heat  
1100 shock-treated *hs:tfap2a* embryos. Scale bar = 35 $\mu$ m. **F.** Quantification of *irx1a* expression domain length in  
1101 WT, *hs:tfap2a* (untreated), *trm*<sup>-/-</sup>, *tfap2a* morphants, and heat shock treated (red HS+) *hs:tfap2a*.  
1102 Measurements were compared by ANOVA. Data are represented as  $\pm$  SD. \*\*p < 0.01, Green brackets  
1103 indicate not statistically significant.

1104

1105

1106 **Figure 7: *tfap2a* and *tfap2b* function in a proposed genetic regulatory network to control distal**  
1107 **nephron differentiation. A.** Schematic comparing DE progenitor maturation in WT and *trm*<sup>-/-</sup>. Mutant cells  
1108 display no perturbations in the early specification of the renal lineage (marked by *lhx1a*, *pax2a*, and  
1109 *hnf1ba*). Mutant progenitors undergo segment specification and exhibit features of mature epithelium  
1110 (*cdh17*, Na,K-ATPase, and acetylated tubulin). In the final phase of differentiation, mutant cells fail to  
1111 express DE-specific solute transporters (*slc12a1*, *romk2*, and *clcnk*). B. Diagram depicts *tfap2a* distal  
1112 nephron GRN. *irx3b* promotes *tfap2a* expression, and *tfap2a* functions upstream of *irx1a* (green arrows).  
1113 *tfap2a* acts upstream of *tfap2b* as the core regulator of solute transporter expression (orange arrows).  
1114 *tfap2b* functions redundantly (purple dotted line) to activate distal solute transporters (*romk2*, *slc12a1*,  
1115 *clcnk*, and *slc12a3*).

1116

1117

1118

1119

## 1120 Supplemental Figures & Figure Legends

1121

1122 **S1 Figure: *Tfap2a* amino acid sequence is highly conserved across vertebrate species.** Depicts  
1123 amino acid alignment of human, mouse, and zebrafish *Tfap2a* generated by T-coffee and Boxshade online  
1124 tools. DNA-binding and dimerization motifs (blue line) display a high degree of sequence similarity (>90  
1125 percent). Black boxes mark conserved residues.

1126

1127

1128 **S2 Figure: *tfap2a* MO splice efficacy verification through RT-PCR analysis. A.** *tfap2a* exon map,  
1129 indicating *tfap2a* MO-splice (red) targets the 3' end of exon 2. Forward and reverse primers used for RT-  
1130 PCR analysis are situated within exon 2 and exon 3 (green arrows). B. Image of RT-PCR gel reveals  
1131 presence of a larger product size in the morphant lane, indicating disrupted splicing. 1 = WT band, 2 =  
1132 morphant band. C. Table presenting the sequencing results of each band. D. WT and *tfap2a* morphant  
1133 amino acid sequences. Inclusion of intron 2-3 results in premature stop codon (red), and a predicted  
1134 truncated protein in *tfap2a* morphants.

1135

1136

1137 **S3 Figure: *tfap2b* MO splice efficacy verification through RT-PCR analysis. A.** *tfap2b* exon map,  
1138 indicating *tfap2b* MO-splice (red) targets the 3' end of exon 4. Forward and reverse primers used for RT-  
1139 PCR analysis are situated within exon 4 and exon 5 (green arrows). B. Image of RT-PCR gel reveals  
1140 presence of a larger product size in the morphant lane, indicating disrupted splicing. 1 = WT band, 2 =  
1141 morphant band. C. Table presenting the sequencing results of each band. D. WT and *tfap2b* morphant

1142 amino acid sequences. Inclusion of intron 4-5 results in premature stop codon (red), and a predicted  
1143 truncated protein in *tfap2b* morphants.

1144

1145

1146 **S4 Figure : *trm*<sup>-/-</sup> mutant embryos exhibit normal filtration and proximal tubule fluid uptake at 3 dpf.**

1147 **A.** WISH analysis of DE markers (*slc12a1* and *romk2*) in WT and *trm*<sup>-/-</sup> mutants at 4 dpf. Scale bars = 200  
1148 μm, 50 μm. **B.** Kidney function assay was performed by injecting 40 kD Dextran FITC into the circulation of  
1149 2 dpf WT and *trm*<sup>-/-</sup> larvae. Images were collected 1-hour post injection and 24-hours post injection. Right  
1150 panel: nephron tubules labeled with green fluorescence indicate endocytosis of Dextran. Scale bar = 150  
1151 μm. **C.** O-dianisidine staining of craniofacial vasculature in WT and *trm*<sup>-/-</sup> at 4 dpf. Abnormal cartilage is  
1152 annotated by black arrowhead. Scale bar = 100 μm.

1153

1154

1155 **S5 Figure: *trm*<sup>-/-</sup> mutant embryos exhibit normal proximal nephron segment pattern formation but**

1156 **have abrogated corpuscle of Stannius formation.** **A.** WISH to evaluate proximal convoluted tubule  
1157 (*slc20a1a*) and proximal straight tubule (*trpm7*) in WT and *trm*<sup>-/-</sup> at 24 hpf. Black arrowheads indicate the  
1158 start and end of *slc20a1a* expression. Scale bar = 50 μm. **B.** Quantification of absolute lengths of *slc20a1a*  
1159 expression. **C.** Quantification of absolute lengths of *trpm7* expression. n = 3 for each control and test  
1160 group. Measurements were compared by unpaired t-test. Data are represented as ± SD. N.S. = not  
1161 significant. **D.** WISH to assess corpuscle of Stannius (*stc1*) development in WT and *trm*<sup>-/-</sup> at 48 hpf. Black  
1162 line indicates *stc1* expression domain. Scale bar = 20 μm.

## Figure 1

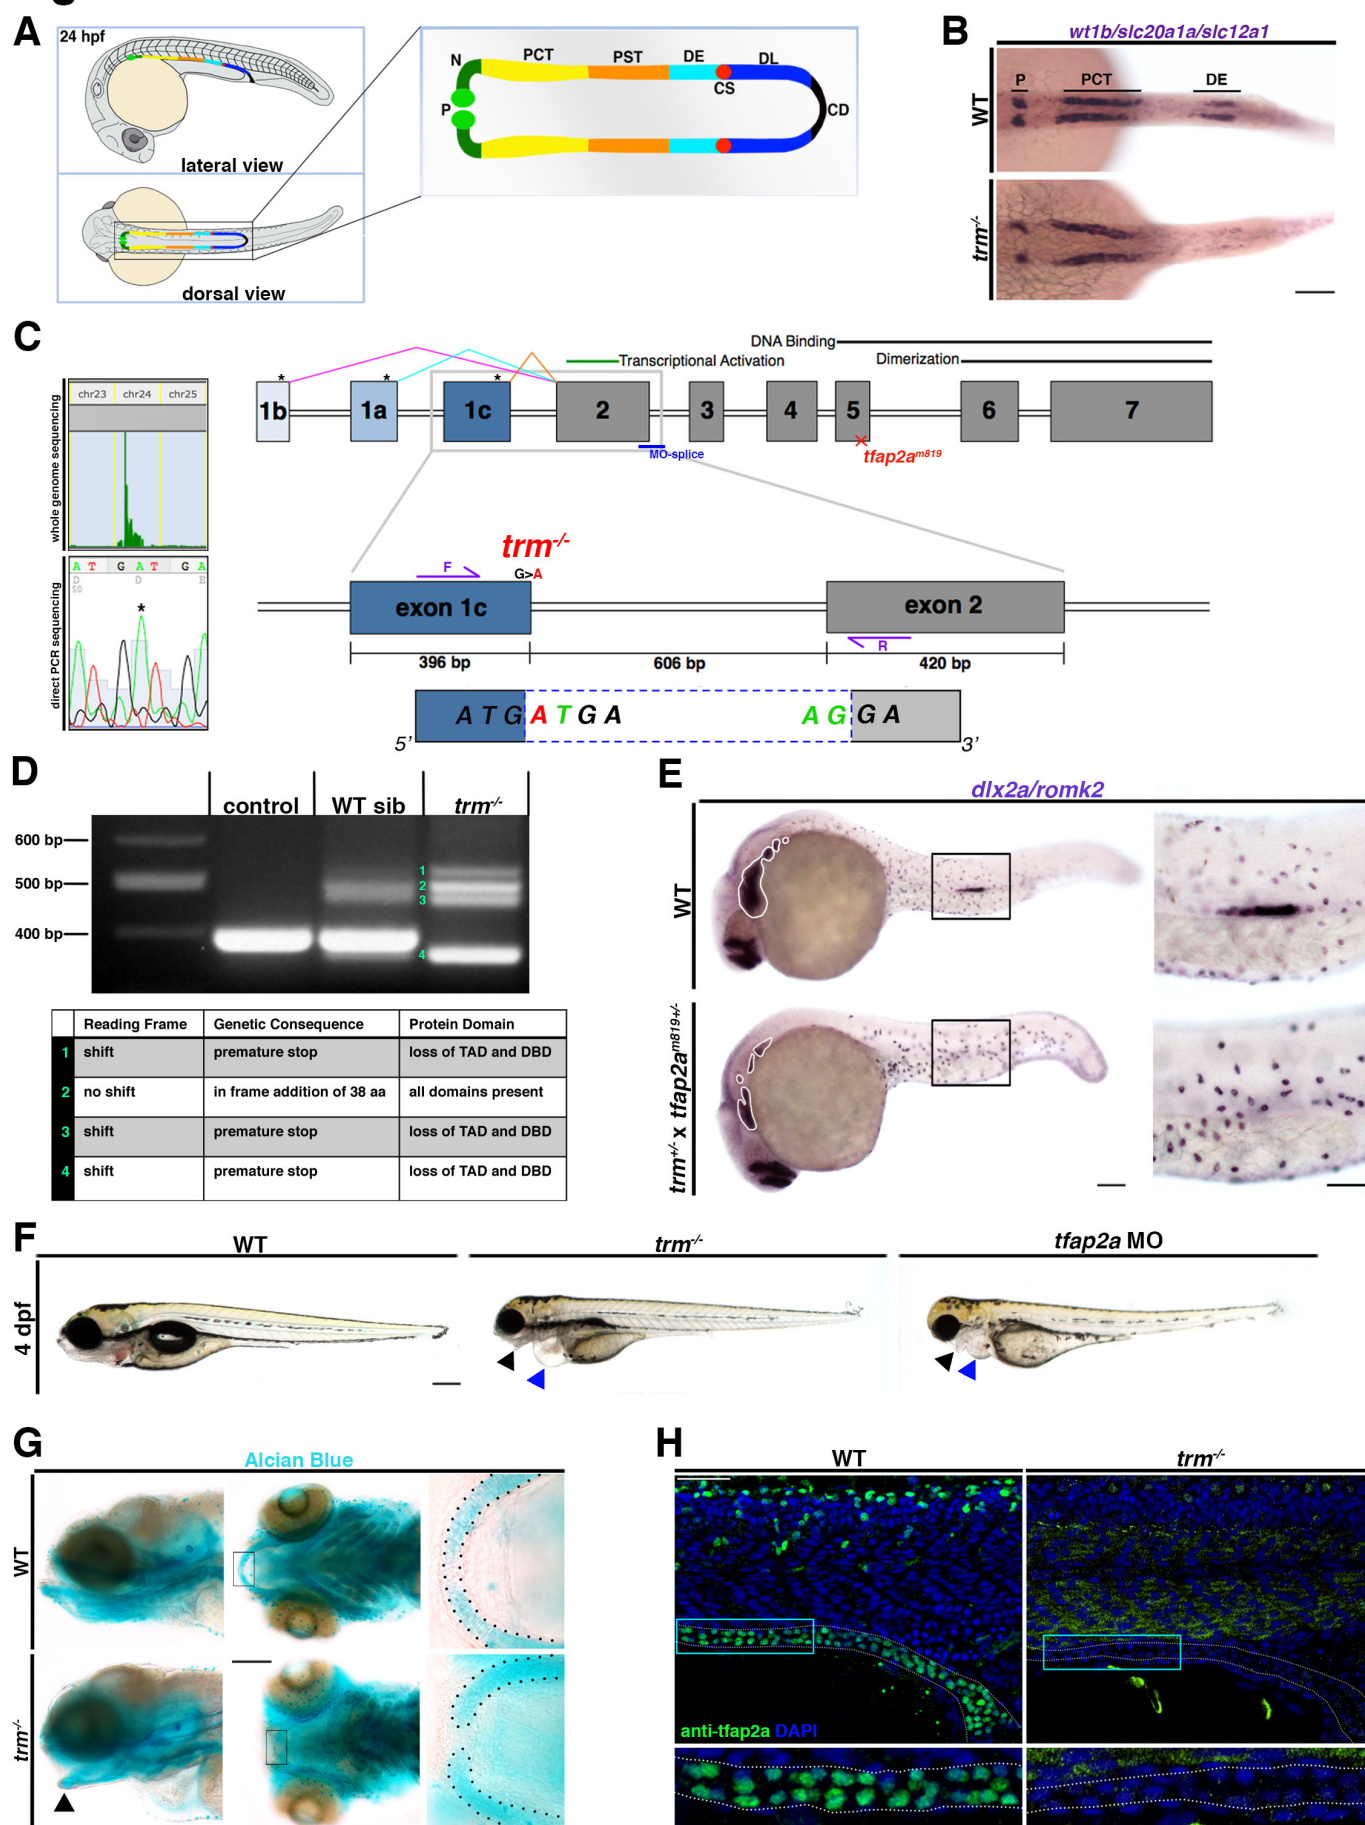



## Figure 2

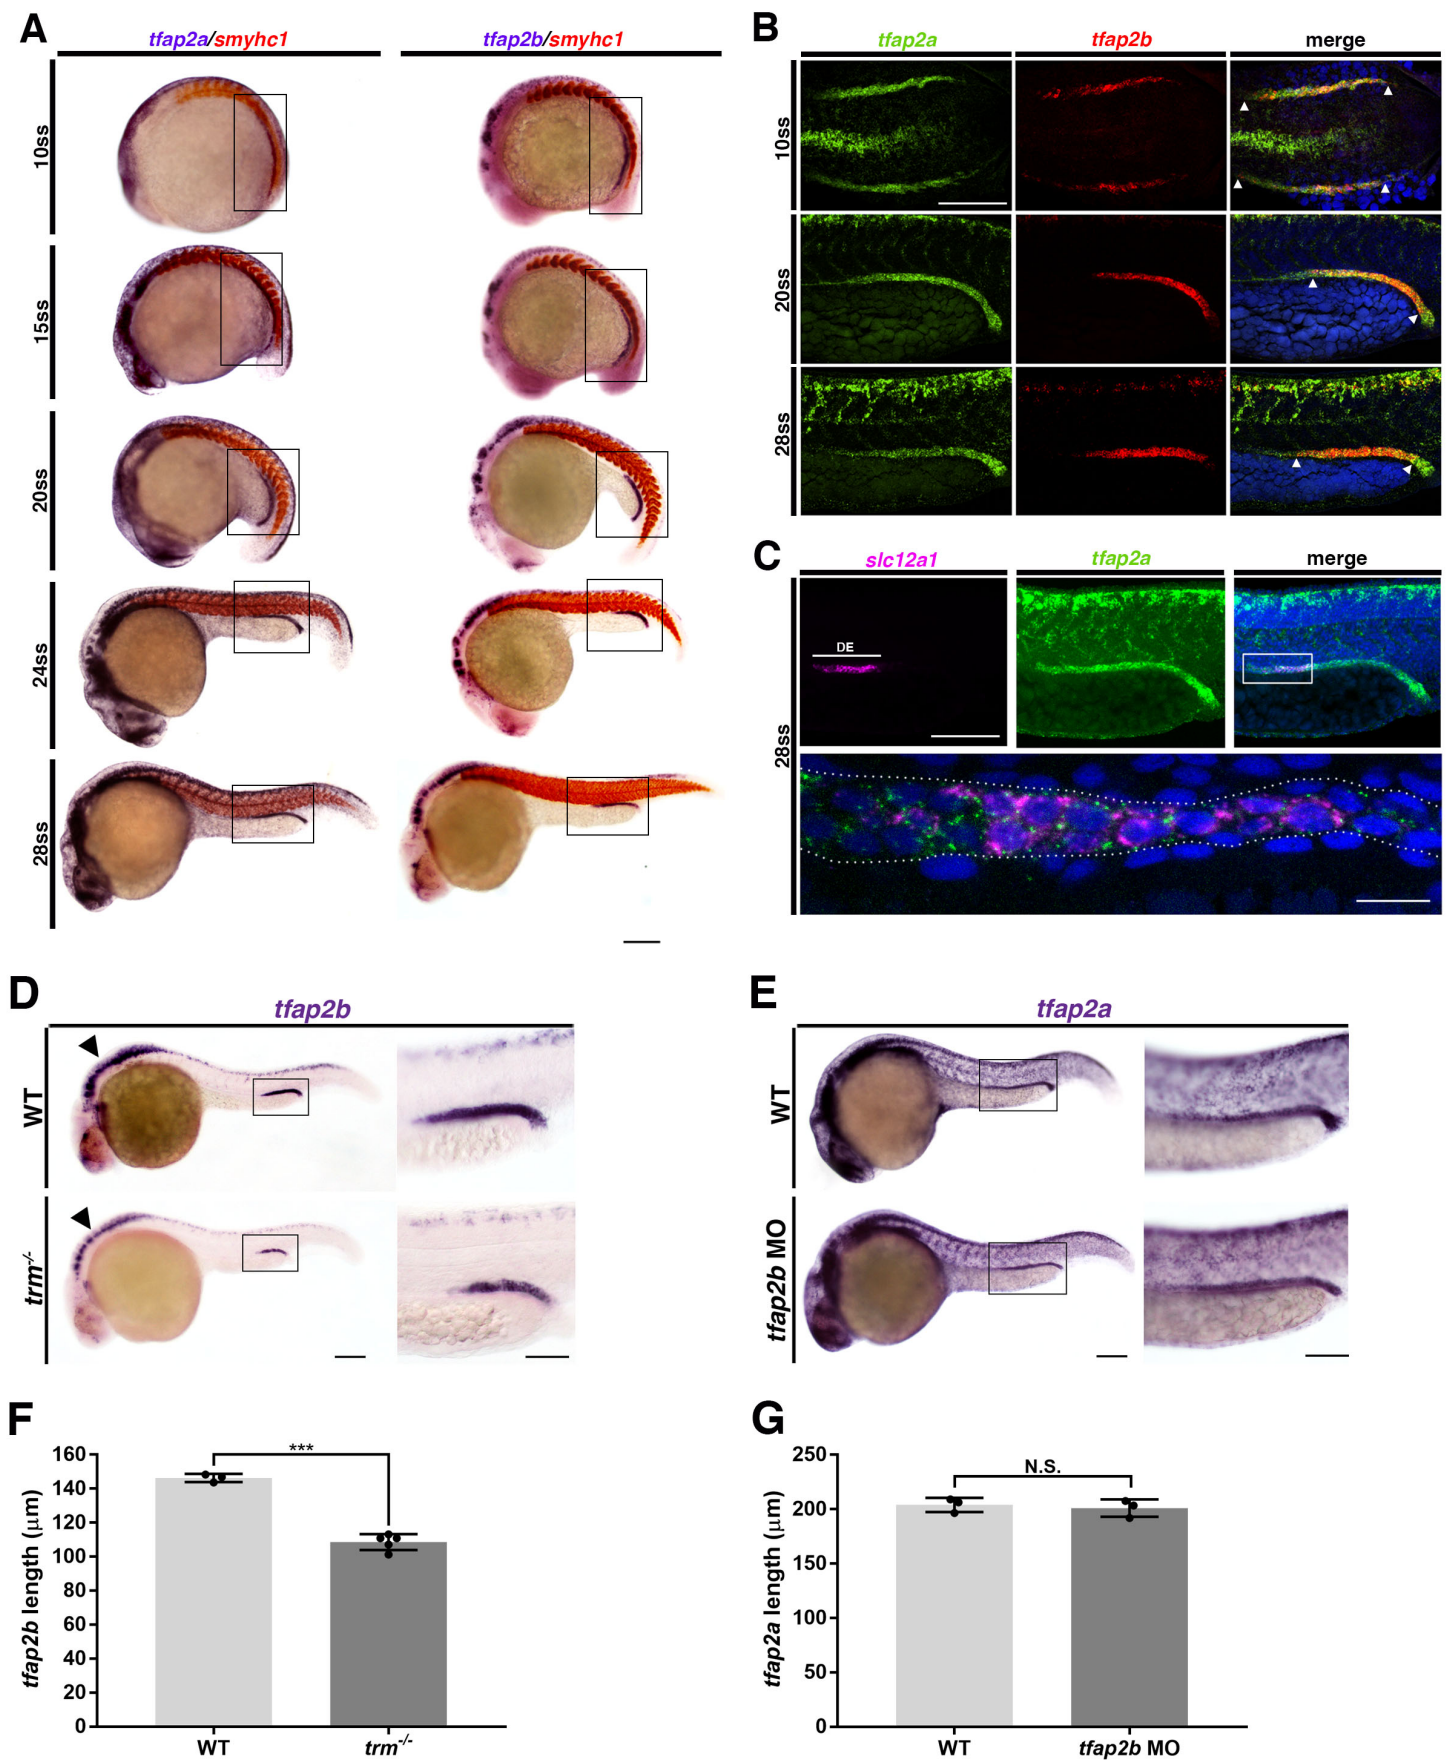



## Figure 3

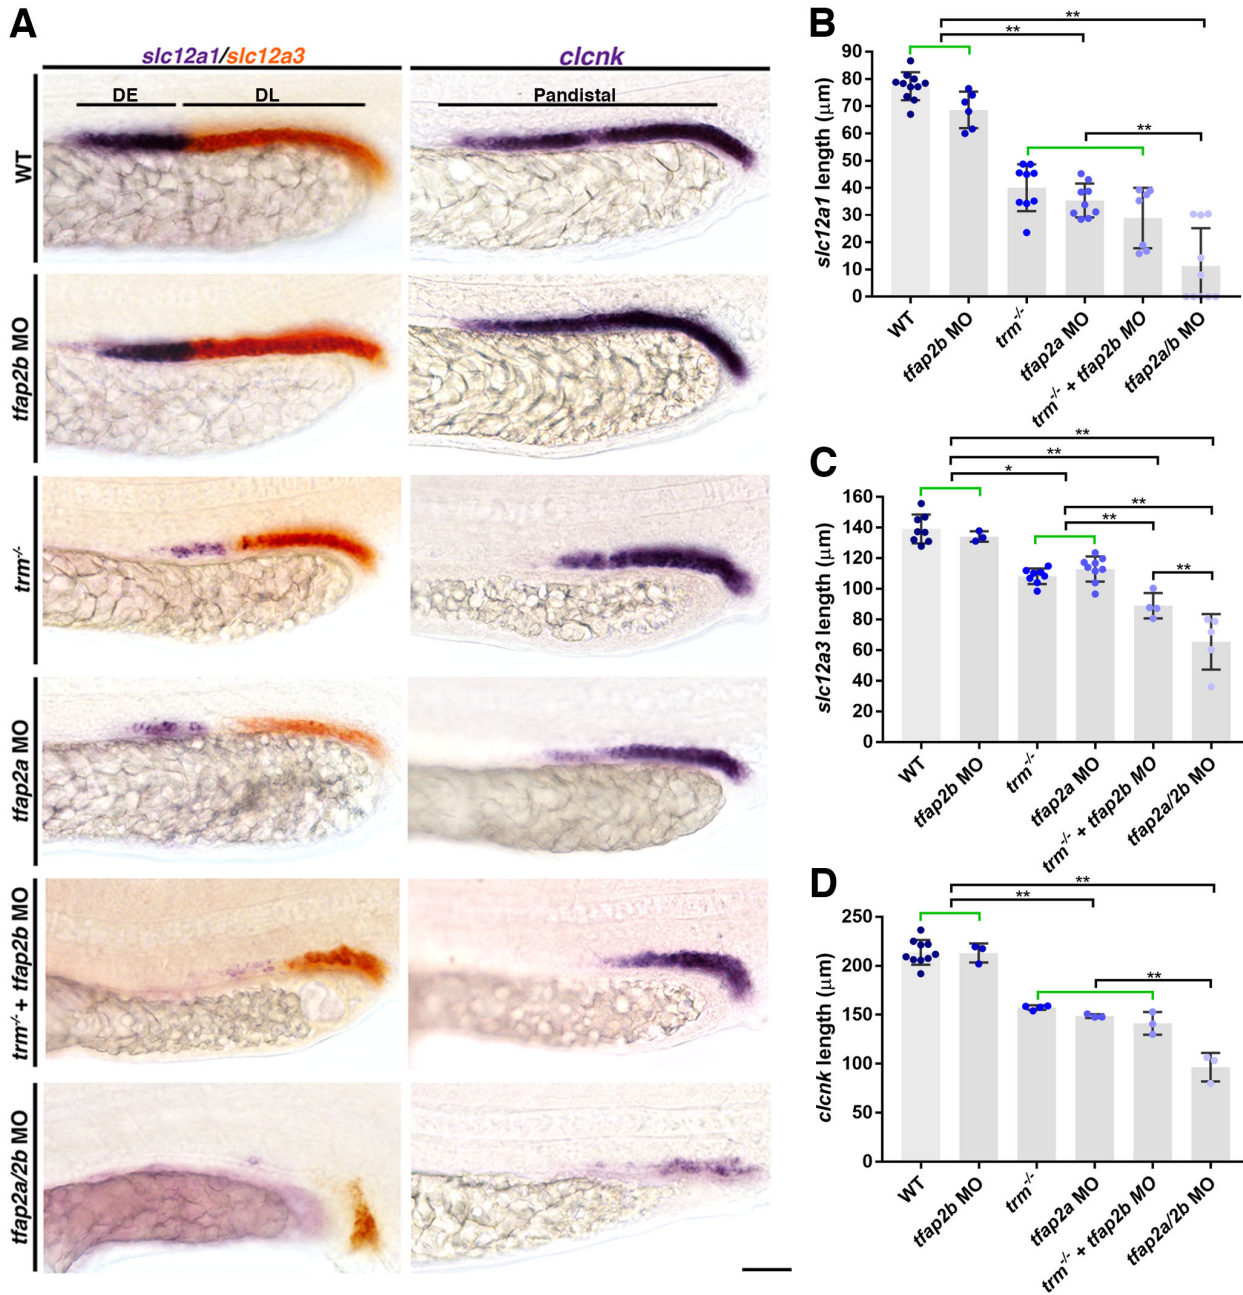

## Figure 4

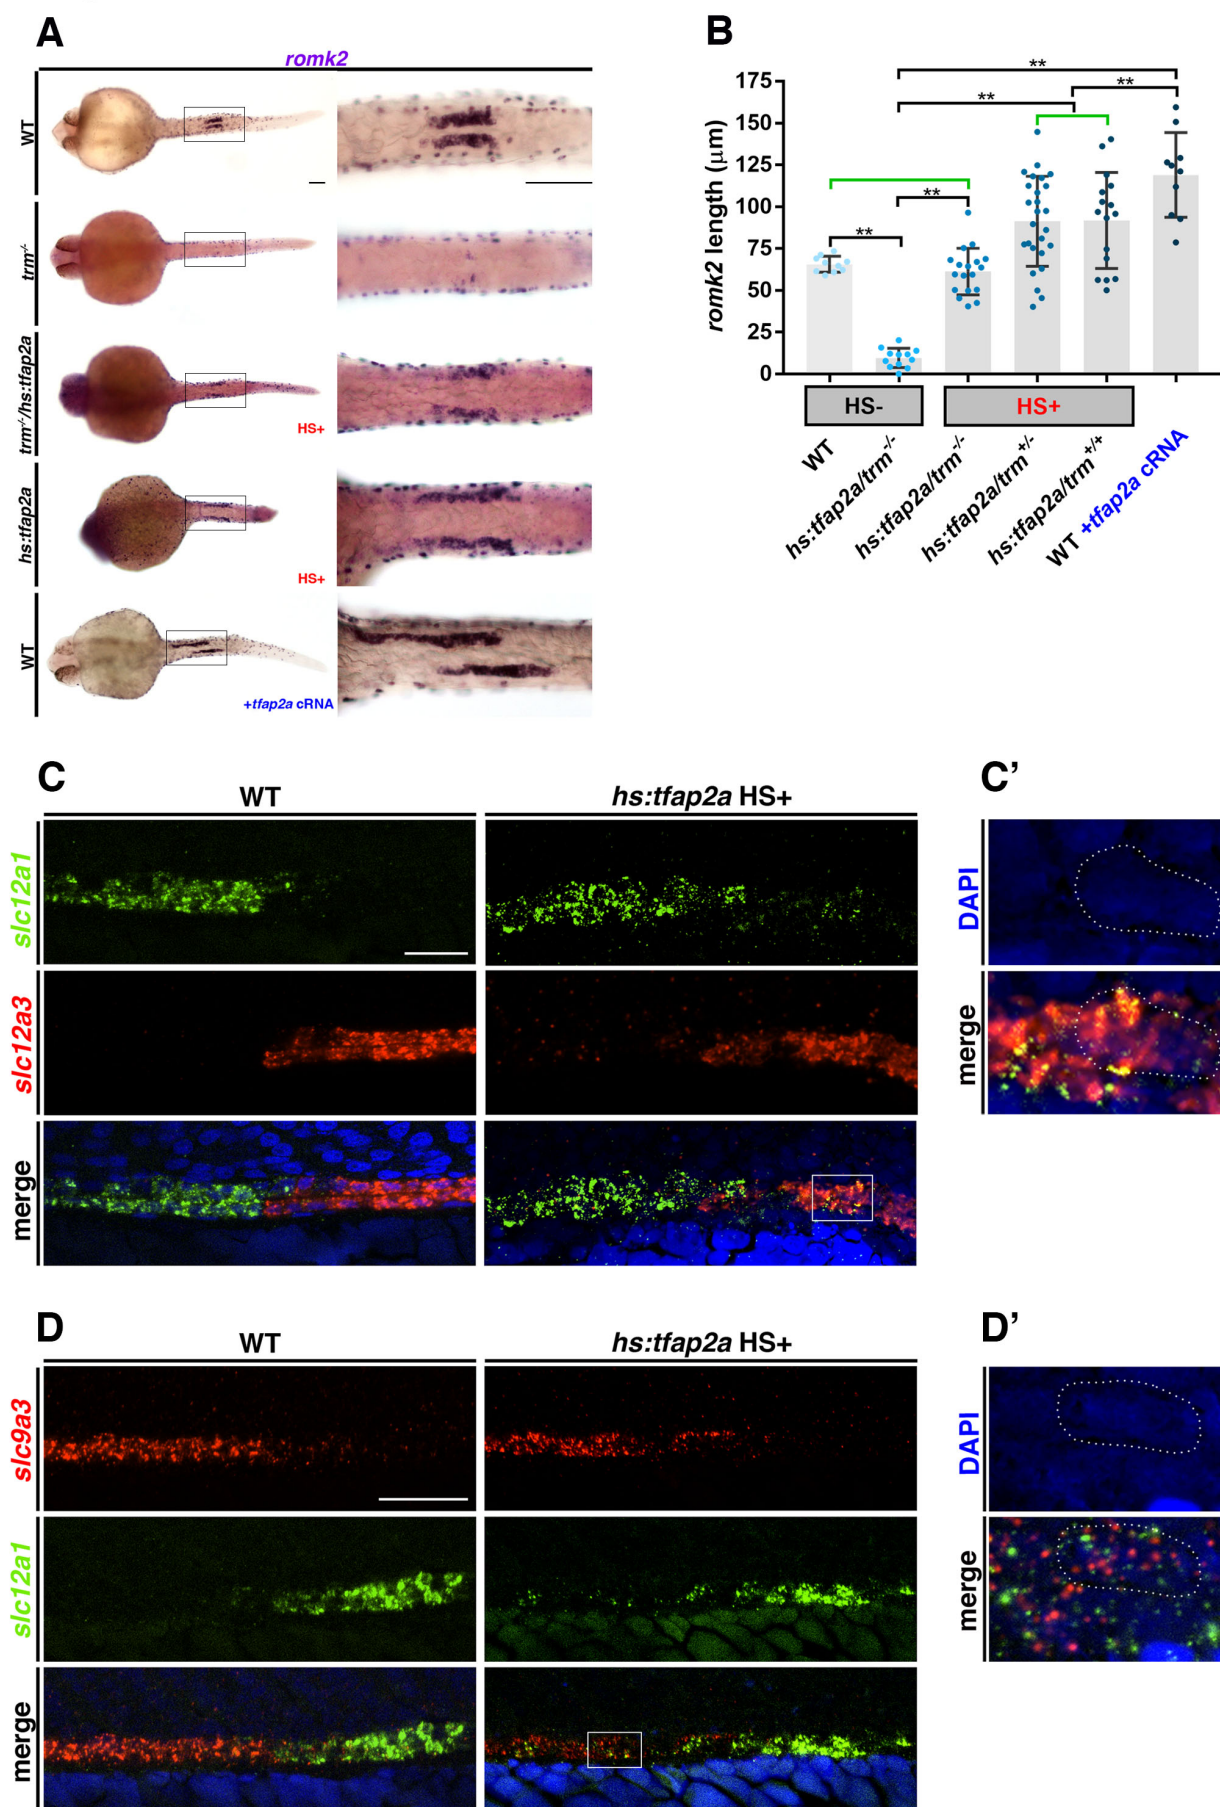



## Figure 5

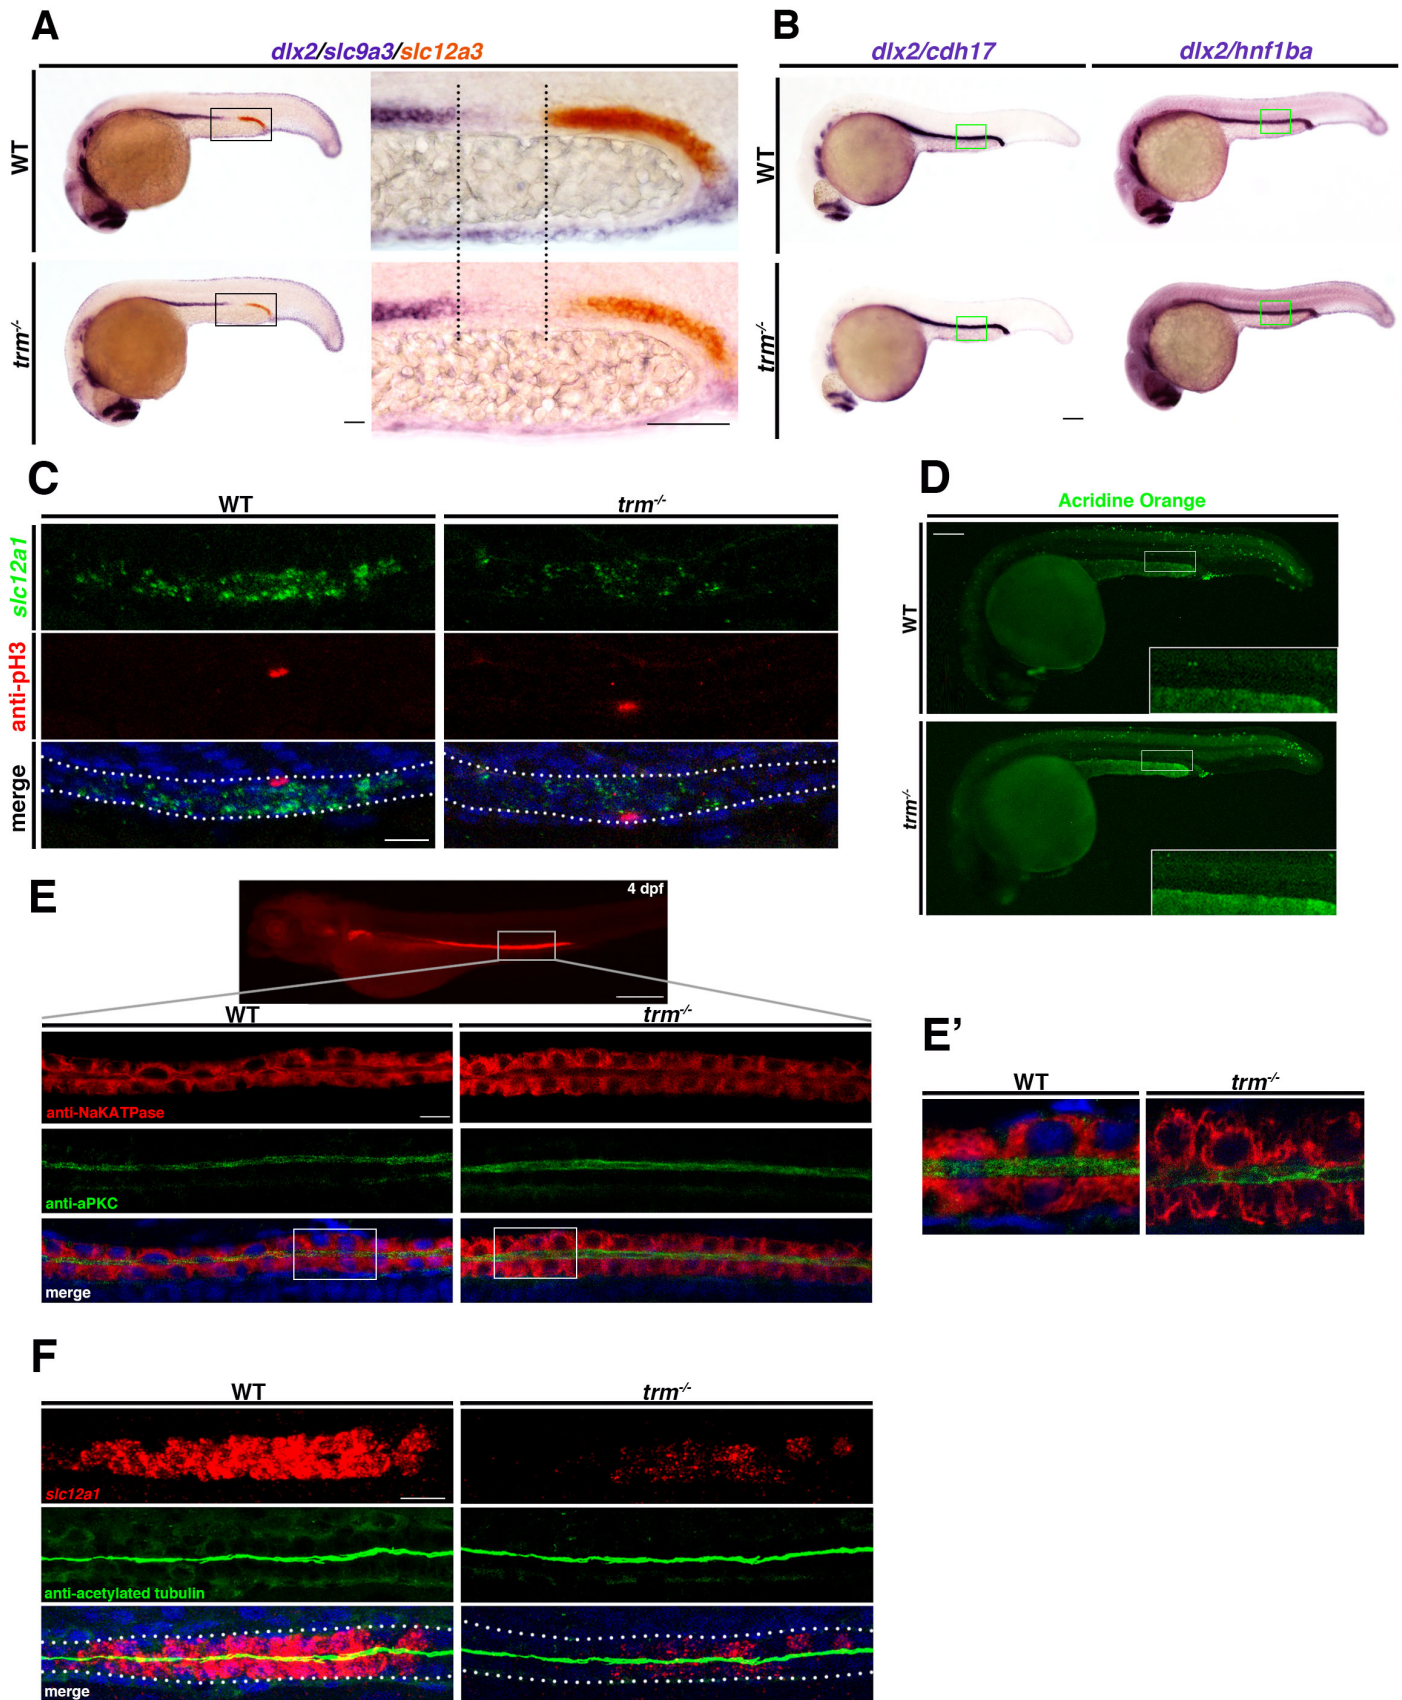

## Figure 6

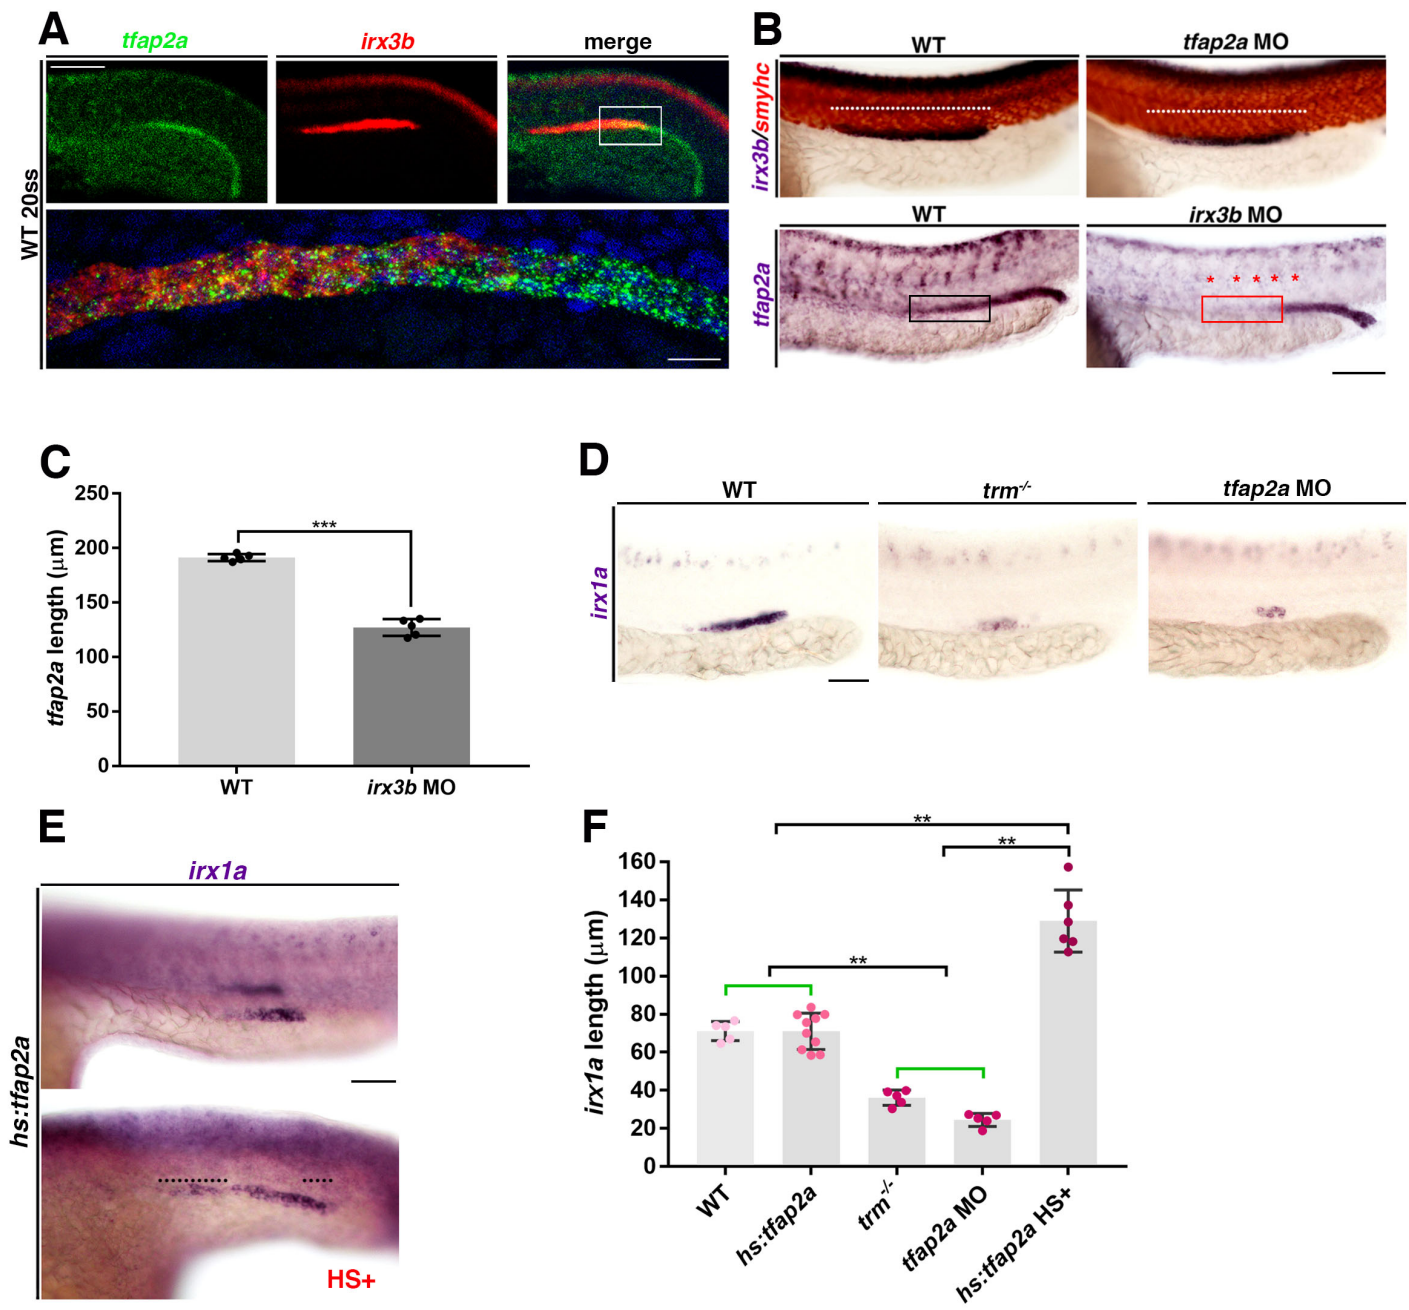

## Figure 7

A

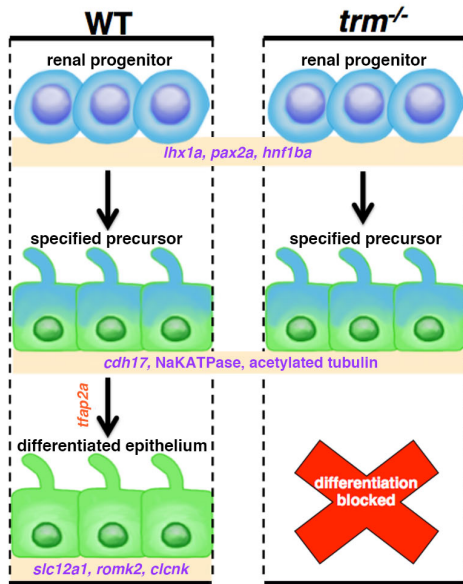

B

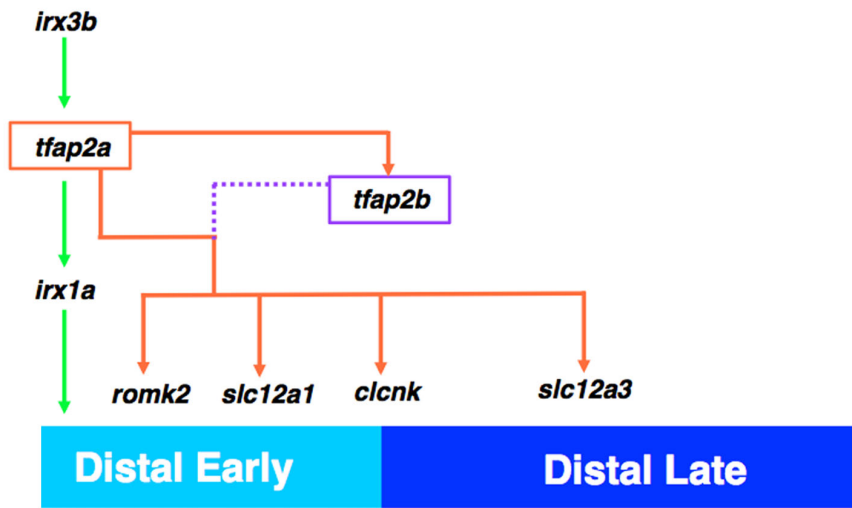



## Figure S1

### *tfap2a* protein alignment

```
human      1  -----MLWKLTDNIKYEDCEDRHDGTSNGTARLPQL
mouse     1  MNSVVVDTPFYFGGLPTLGLWNCFSRVVEALRLISSSPSLAEFDLDRHDGTSNGTARLPQL
zebrafish 1  MHCVKIK-----RRRTALYPQPMKMLWKLTDNIKYEDFEDRHDGTSNGTARLPQL

human     32  GTVGQSPYTSAPPLSHTPNADFQPPYFPPPYQPIYQSQDPYSHVNDPYSLNPLHAQPQP
mouse    61  GTVGQSPYTSAPPLSHTPNADFQPPYFPPPYQPIYQSQDPYSHVNDPYSLNPLHAQPQP
zebrafish 51  GSVGQSPYTSAPPLSHTPNNSDFQPPYFPPPYQPIYQSQDPYSHVNDPYSINSLHAQSQP

human     92  QHPGWPGQRQSQESGLLHTRGLPHQLSGLDPRRDYRRHEDLLHGPHALSSGLGDLSTHS
mouse    121  QHPGWPGQRQSQESGLLHTRGLPHQLSGLDPRRDYRRHEDLLHGPHGLGSGLDLPIHS
zebrafish 111  QHPGWPGQRQSQESSLLHQHRLGLPHQLC-----REYRREVLTPSCHGIDTGLTDSIPIHG

human    152  LPHAIEEVPHVVEDPGINIPDQTVIKKGPVSLSKSNSNAVSAIPINKDNLFGGVVNPNEVF
mouse    181  LPHAIEDVPHVEDPGINIPDQTVIKKGPVSLSKSNSNAVSAIPINKDNLFGGVVNPNEVF
zebrafish 166  IPHSLIEDVQQVEDQGIHIPDQTVIKKGPVSIKNNNS-NISAIPIKNDGLFGGVVNPNEVF

human    212  CSVPGRLSLLSSTSKYKVTVAEVQRRLSPPECLNASLLGGVLRRAKSKNGGRSLREKLDK
mouse    241  CSVPGRLSLLSSTSKYKVTVAEVQRRLSPPECLNASLLGGVLRRAKSKNGGRSLREKLDK
zebrafish 225  CSVPGRLSLLSSTSKYKVTVAEVQRRLSPPECLNASLLGGVLRRAKSKNGGRSLREKLDK

          DNA-binding/Dimerization domain
human    272  IGLNLPAGRRKAANVTLTSLVEGEAVHLARDFGYVCETEFPKAVAEFLNRQHSDPNEQ
mouse    301  IGLNLPAGRRKAANVTLTSLVEGEAVHLARDFGYVCETEFPKAVAEFLNRQHSDPNEQ
zebrafish 285  IGLNLPAGRRKAANVTLTSLVEGEAVHLARDFGYVCETEFPKATAEYMNRRQHSDPNEQ

human    332  VTRKNMLLATKQICKEFTDLLAQDRSPLGNSRPNPILEPGIQSCLTHFNLISHGFGSPAV
mouse    361  VARKNMLLATKQICKEFTDLLAQDRSPLGNSRPNPILEPGIQSCLTHFNLISHGFGSPAV
zebrafish 345  VQRKNMLLATKQICKEFTDLLSQDRSPLGNSRPNPILEPGIQSCLTHFSLISHGFGTIPAV

human    392  CAAVTALQNYLTEALKAMDKMYLSNNPNSHTDNNAKSSDKEEKHRK
mouse    421  CAAVTALQNYLTEALKAMDKMYLSNNPNSHTDNSAKSSDKEEKHRK
zebrafish 405  CAAVTALQNYLTEALKAMDKMYLNNNPNSHSETGSKAGDKDEKHRK
```

## Figure S2

**A**

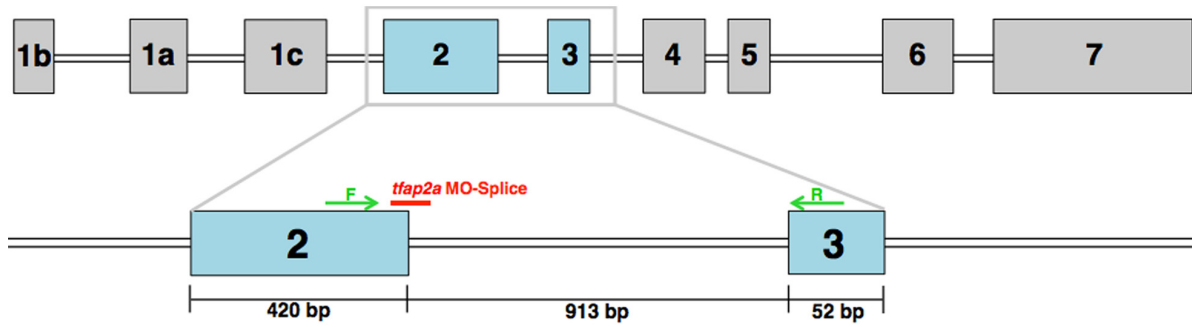

**B**

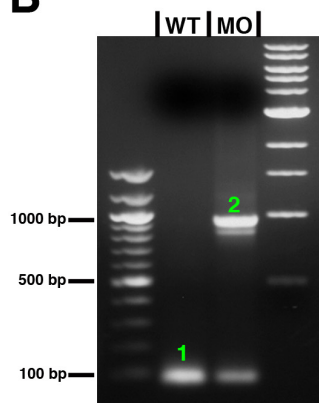

**C**

| Band | Size   | Result                  |
|------|--------|-------------------------|
| 1    | 74 bp  | WT <i>tfap2a</i>        |
| 2    | 987 bp | Inclusion of intron 2-3 |

**D**

WT ...HSLEDVQ QVEDQGIHI...

exon 2                      exon 3

MO ...HSLEDVQ VRRKAKILQCAAVQRDYSDFLLMH**STOP**

exon 2                      intron 2-3

## Figure S3

A

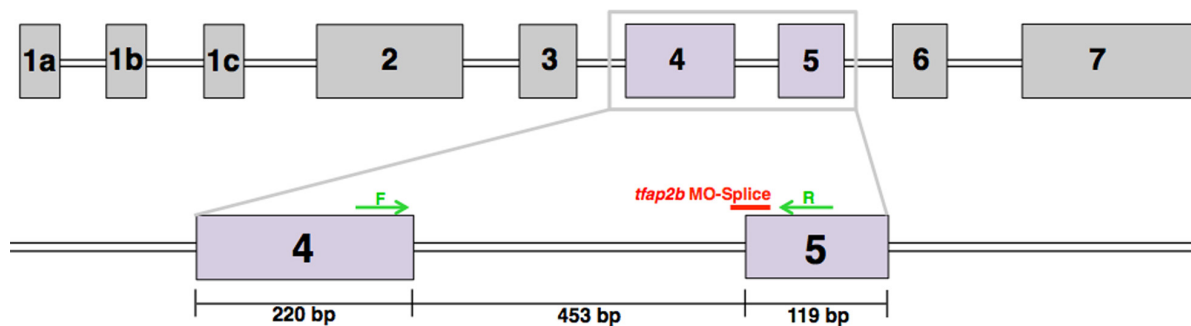

B

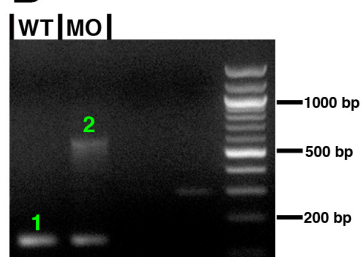

C

| Band | Size   | Result                  |
|------|--------|-------------------------|
| 1    | 135 bp | WT <i>tfap2b</i>        |
| 2    | 588 bp | Inclusion of intron 4-5 |

D

WT ...CLNASLLGGVLRR AKSKNGGRSLREKL...

exon 4

exon 5

MO ...CLNASLLGGVLRR **STOP**

exon 4

intron 4-5

## Figure S4

**A**

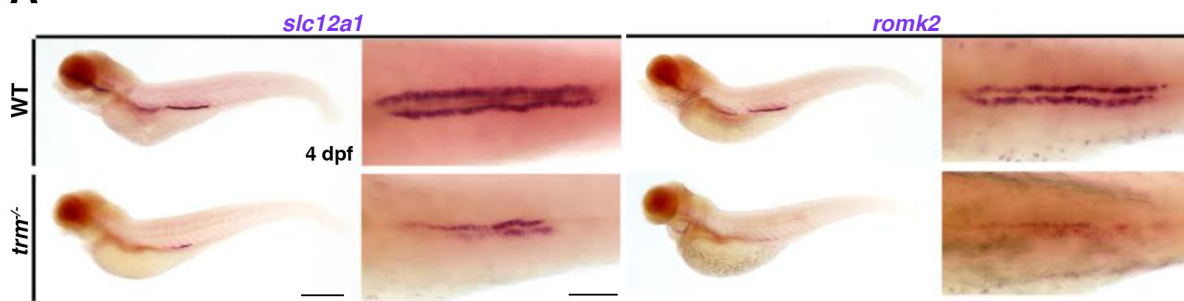

**B**

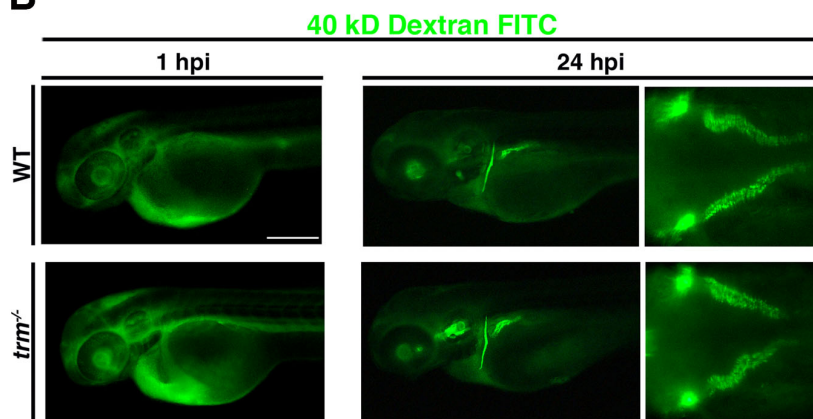

**C**

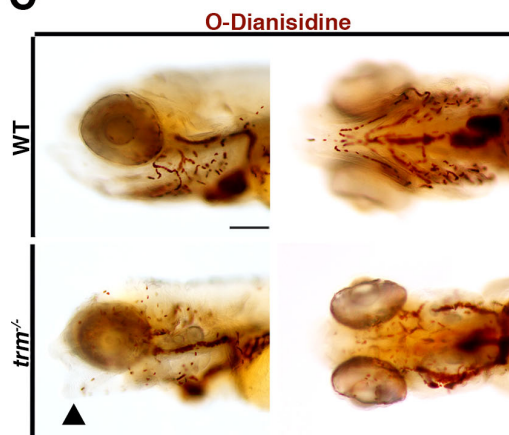

## Figure S5

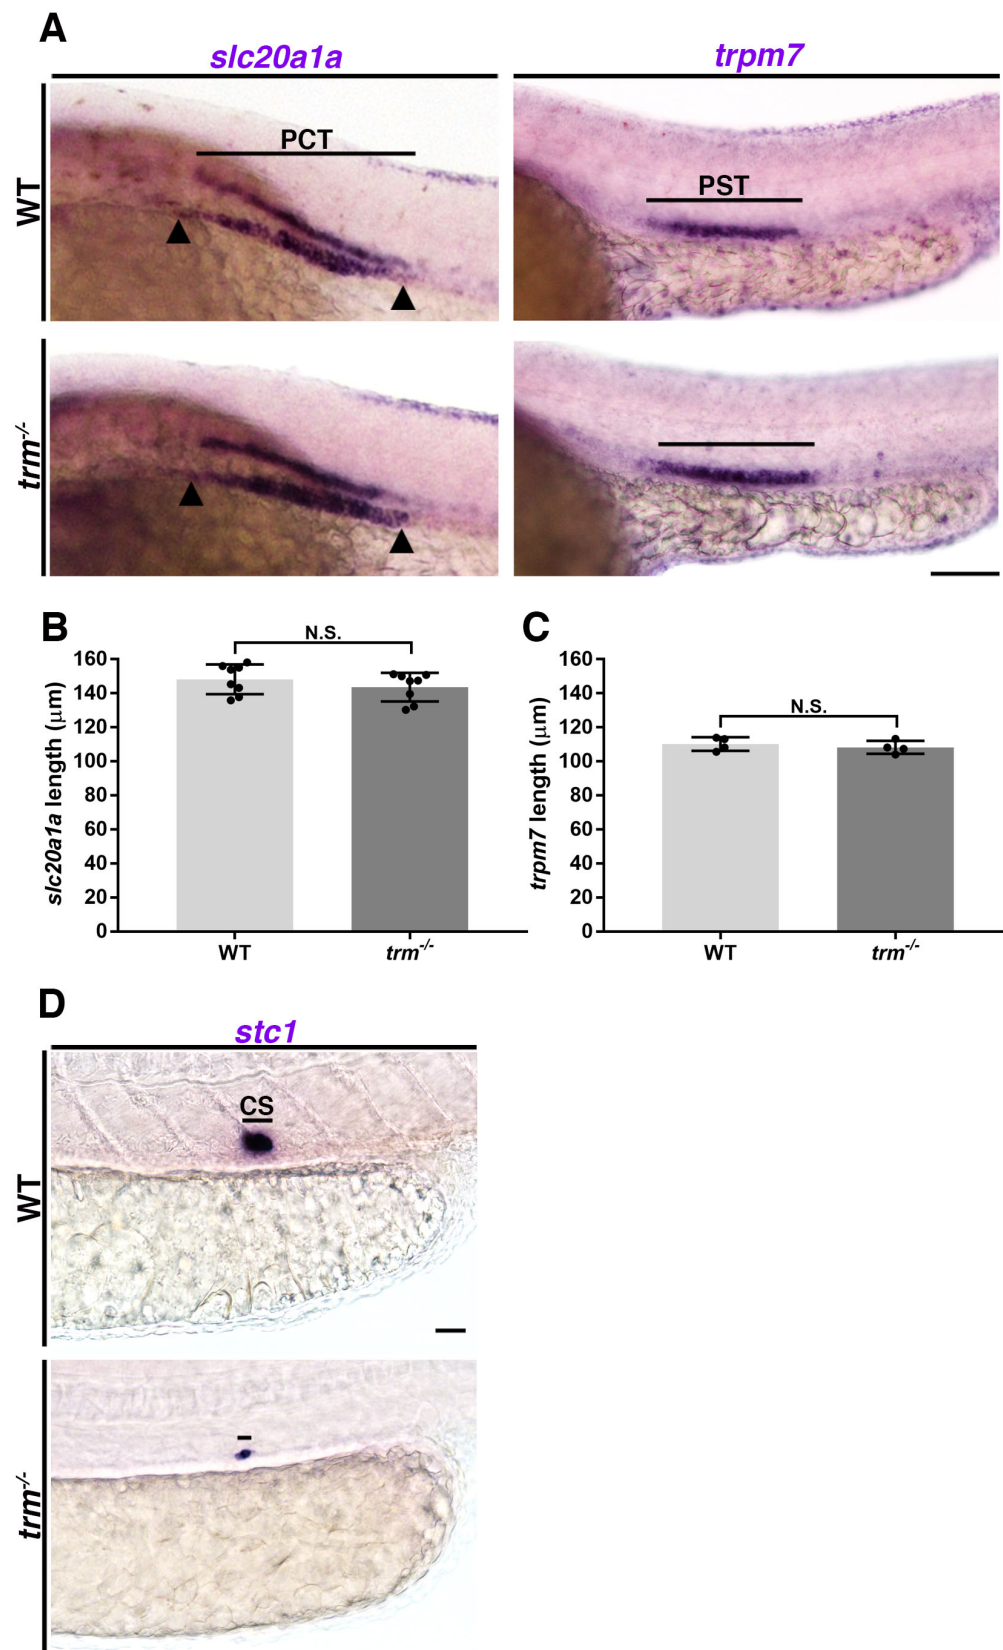

Source: https://www.biorxiv.org/content/10.1101/460105v1.full.pdf
